# Supplementary material for: Theoretical investigations of the reactivities of lattice-framework carbene analogues of the group 14 elements
Source: Royal Society of Chemistry journal article supplement (doi:10.1039/c0dt00113a), 2010-01-01
Supplement: c0dt00113a.pdf [file c0dt00113a.pdf]

# Supporting Information

## Theoretical Investigations of the Reactivities of Lattice–Framework Carbene Analogues of the Group 14 Elements

Jun Hsiao and Ming-Der Su\*

Department of Applied Chemistry, National Chiayi University, Chiayi 60004,  
Taiwan

Email: midesu@mail.ncyu.edu.tw

(All geometries were calculated B3LYP/LANL2DZ)

---

**Rea-C (Singlet)**

---

| Atomic<br>Number | Coordinates (Angstroms) |           |           |
|------------------|-------------------------|-----------|-----------|
|                  | X                       | Y         | Z         |
| 6                | -2.211603               | 0.056699  | -0.094005 |
| 6                | -0.860040               | 0.734272  | -0.542149 |
| 6                | 0.787297                | 0.077098  | 1.042660  |
| 6                | 1.995366                | -0.323672 | 0.122092  |
| 6                | -2.024591               | -1.301008 | 0.001472  |
| 6                | 1.637329                | -1.305635 | -0.773916 |
| 6                | 3.319924                | 0.378246  | 0.275382  |
| 1                | 4.068522                | 0.008056  | -0.434063 |
| 1                | 3.193085                | 1.460063  | 0.124515  |
| 1                | 3.717497                | 0.245690  | 1.291185  |
| 6                | 2.430730                | -1.962270 | -1.868070 |
| 1                | 1.992159                | -1.761416 | -2.856260 |
| 1                | 3.471568                | -1.612422 | -1.888296 |
| 1                | 2.448722                | -3.053798 | -1.742733 |
| 6                | 1.119183                | -0.021064 | 2.536935  |
| 1                | 1.607194                | -0.974431 | 2.786805  |
| 1                | 1.785694                | 0.802365  | 2.841731  |
| 1                | 0.207423                | 0.062525  | 3.140838  |
| 6                | -0.988816               | 1.699167  | -1.723674 |
| 1                | -1.539949               | 1.244326  | -2.560428 |
| 1                | -1.511586               | 2.620989  | -1.417850 |
| 1                | -0.000262               | 1.996668  | -2.095655 |
| 6                | -3.429025               | 0.874809  | 0.242076  |
| 1                | -4.258895               | 0.259091  | 0.606745  |
| 1                | -3.169589               | 1.618269  | 1.009436  |
| 1                | -3.778444               | 1.435383  | -0.636680 |
| 6                | -2.958694               | -2.390319 | 0.445879  |
| 1                | -2.566231               | -2.914194 | 1.329317  |
| 1                | -3.951946               | -1.998590 | 0.702697  |
| 1                | -3.092707               | -3.146656 | -0.340036 |
| 6                | -0.088552               | 1.305924  | 0.692525  |
| 14               | -0.163518               | -1.039318 | -0.282590 |

---

Zero-point correction= 0.268194

(Hartree/Particle)

|                                              |             |
|----------------------------------------------|-------------|
| Thermal correction to Energy=                | 0.284746    |
| Thermal correction to Enthalpy=              | 0.285690    |
| Thermal correction to Gibbs Free Energy=     | 0.226018    |
| Sum of electronic and zero-point Energies=   | -509.511051 |
| Sum of electronic and thermal Energies=      | -509.494499 |
| Sum of electronic and thermal Enthalpies=    | -509.493555 |
| Sum of electronic and thermal Free Energies= | -509.553227 |

---

**Rea-C (Triplet)**

---

| Atomic<br>Number | Coordinates (Angstroms) |           |           |
|------------------|-------------------------|-----------|-----------|
|                  | X                       | Y         | Z         |
| 6                | -2.221324               | 0.106889  | -0.085567 |
| 6                | -0.910253               | 0.802633  | -0.581017 |
| 6                | 0.833942                | 0.074464  | 1.044933  |
| 6                | 2.063051                | -0.315392 | 0.159328  |
| 6                | -1.999323               | -1.249788 | -0.000999 |
| 6                | 1.663944                | -1.257852 | -0.762600 |
| 6                | 3.403014                | 0.358341  | 0.307791  |
| 1                | 4.138370                | -0.000916 | -0.421436 |
| 1                | 3.293428                | 1.444933  | 0.184339  |
| 1                | 3.811542                | 0.191611  | 1.314774  |
| 6                | 2.430632                | -1.923461 | -1.872377 |
| 1                | 2.002331                | -1.684656 | -2.856448 |
| 1                | 3.484289                | -1.613699 | -1.881380 |
| 1                | 2.407070                | -3.017471 | -1.769538 |
| 6                | 1.027449                | -0.079537 | 2.549850  |
| 1                | 1.472125                | -1.052537 | 2.799390  |
| 1                | 1.691004                | 0.704229  | 2.947345  |
| 1                | 0.069390                | 0.007023  | 3.077086  |
| 6                | -1.054600               | 1.678237  | -1.821340 |
| 1                | -1.611945               | 1.161076  | -2.614142 |
| 1                | -1.591316               | 2.611095  | -1.587987 |
| 1                | -0.071032               | 1.958741  | -2.217856 |
| 6                | -3.445320               | 0.894545  | 0.306138  |
| 1                | -4.254927               | 0.257046  | 0.679809  |
| 1                | -3.188644               | 1.623864  | 1.087300  |

|    |           |           |           |
|----|-----------|-----------|-----------|
| 1  | -3.829367 | 1.466921  | -0.550420 |
| 6  | -2.898546 | -2.358378 | 0.472292  |
| 1  | -2.493381 | -2.848408 | 1.369502  |
| 1  | -3.903990 | -1.990295 | 0.716865  |
| 1  | -3.007763 | -3.136629 | -0.296011 |
| 6  | 0.025615  | 1.255231  | 0.529269  |
| 14 | -0.148221 | -0.993014 | -0.291010 |

---

|                                              |             |
|----------------------------------------------|-------------|
| Zero-point correction=                       | 0.269562    |
| (Hartree/Particle)                           |             |
| Thermal correction to Energy=                | 0.286547    |
| Thermal correction to Enthalpy=              | 0.287491    |
| Thermal correction to Gibbs Free Energy=     | 0.225735    |
| Sum of electronic and zero-point Energies=   | -509.524633 |
| Sum of electronic and thermal Energies=      | -509.507648 |
| Sum of electronic and thermal Enthalpies=    | -509.506704 |
| Sum of electronic and thermal Free Energies= | -509.568461 |

---

### Rea-Si (Singlet)

---

| Atomic<br>Number | Coordinates (Angstroms) |           |           |
|------------------|-------------------------|-----------|-----------|
|                  | X                       | Y         | Z         |
| 14               | -2.221753               | -0.089526 | -0.030566 |
| 14               | 0.605106                | 0.020582  | 0.010329  |
| 6                | -0.209048               | 1.596163  | 1.527902  |
| 6                | -0.801190               | 0.172567  | 1.340436  |
| 6                | -0.744252               | -0.223299 | -1.360650 |
| 6                | -0.047224               | -1.600361 | -1.538789 |
| 6                | 0.947303                | 1.710276  | 0.782341  |
| 6                | 1.088473                | -1.638207 | -0.754707 |
| 6                | -0.617101               | -2.681261 | -2.424136 |
| 1                | 0.010719                | -3.579468 | -2.445825 |
| 1                | -1.623694               | -2.968176 | -2.084272 |
| 1                | -0.726272               | -2.317477 | -3.455502 |
| 6                | 2.071857                | -2.751115 | -0.518823 |
| 1                | 2.110509                | -3.033363 | 0.543718  |
| 1                | 1.820509                | -3.652846 | -1.094190 |
| 1                | 3.089621                | -2.448195 | -0.803661 |

|   |           |           |           |
|---|-----------|-----------|-----------|
| 6 | -0.973836 | 0.547720  | -2.671054 |
| 1 | -0.047787 | 0.614606  | -3.263017 |
| 1 | -1.737417 | 0.064851  | -3.300875 |
| 1 | -1.313785 | 1.576552  | -2.486539 |
| 6 | -1.013054 | -0.602168 | 2.651835  |
| 1 | -0.098982 | -0.605645 | 3.265781  |
| 1 | -1.820224 | -0.163233 | 3.258985  |
| 1 | -1.283452 | -1.651682 | 2.469185  |
| 6 | -0.885080 | 2.639369  | 2.383411  |
| 1 | -0.326425 | 3.581830  | 2.414886  |
| 1 | -1.898538 | 2.847696  | 2.008482  |
| 1 | -1.000502 | 2.277620  | 3.414780  |
| 6 | 1.855904  | 2.889818  | 0.570682  |
| 1 | 1.905660  | 3.172238  | -0.491032 |
| 1 | 1.524726  | 3.772275  | 1.134862  |
| 1 | 2.883492  | 2.660591  | 0.886227  |

---

|                                              |             |
|----------------------------------------------|-------------|
| Zero-point correction=                       | 0.265928    |
| (Hartree/Particle)                           |             |
| Thermal correction to Energy=                | 0.283987    |
| Thermal correction to Enthalpy=              | 0.284931    |
| Thermal correction to Gibbs Free Energy=     | 0.220952    |
| Sum of electronic and zero-point Energies=   | -475.396777 |
| Sum of electronic and thermal Energies=      | -475.378718 |
| Sum of electronic and thermal Enthalpies=    | -475.377774 |
| Sum of electronic and thermal Free Energies= | -475.441752 |

---

### Rea-Si (Triplet)

---

| Atomic<br>Number | Coordinates (Angstroms) |           |           |
|------------------|-------------------------|-----------|-----------|
|                  | X                       | Y         | Z         |
| 14               | -2.161406               | -0.071638 | -0.033796 |
| 14               | 0.544727                | 0.022473  | 0.006584  |
| 6                | -0.241895               | 1.616543  | 1.570185  |
| 6                | -0.809934               | 0.189455  | 1.406799  |
| 6                | -0.752587               | -0.236717 | -1.433202 |
| 6                | -0.081030               | -1.620247 | -1.578851 |

---

|   |           |           |           |
|---|-----------|-----------|-----------|
| 6 | 0.888165  | 1.714326  | 0.784505  |
| 6 | 1.028599  | -1.640133 | -0.758997 |
| 6 | -0.630816 | -2.713066 | -2.458259 |
| 1 | -0.022851 | -3.624365 | -2.426944 |
| 1 | -1.654493 | -2.968139 | -2.148799 |
| 1 | -0.688552 | -2.376145 | -3.503116 |
| 6 | 2.027282  | -2.732575 | -0.494518 |
| 1 | 2.016819  | -3.037644 | 0.562062  |
| 1 | 1.826328  | -3.624887 | -1.102411 |
| 1 | 3.050689  | -2.401093 | -0.720059 |
| 6 | -0.912164 | 0.563777  | -2.727271 |
| 1 | 0.030545  | 0.590450  | -3.296667 |
| 1 | -1.677780 | 0.123161  | -3.383800 |
| 1 | -1.215794 | 1.597632  | -2.521406 |
| 6 | -0.950742 | -0.621670 | 2.696395  |
| 1 | -0.025629 | -0.581939 | 3.293222  |
| 1 | -1.764625 | -0.237208 | 3.329738  |
| 1 | -1.174227 | -1.674171 | 2.482504  |
| 6 | -0.896519 | 2.667766  | 2.428202  |
| 1 | -0.358629 | 3.622427  | 2.409226  |
| 1 | -1.927227 | 2.842869  | 2.087904  |
| 1 | -0.958852 | 2.330874  | 3.472830  |
| 6 | 1.815291  | 2.874439  | 0.549226  |
| 1 | 1.820989  | 3.174743  | -0.508688 |
| 1 | 1.529602  | 3.751870  | 1.144747  |
| 1 | 2.850978  | 2.617561  | 0.812857  |

---

|                                              |             |
|----------------------------------------------|-------------|
| Zero-point correction=                       | 0.266399    |
| (Hartree/Particle)                           |             |
| Thermal correction to Energy=                | 0.284202    |
| Thermal correction to Enthalpy=              | 0.285146    |
| Thermal correction to Gibbs Free Energy=     | 0.221398    |
| Sum of electronic and zero-point Energies=   | -475.374320 |
| Sum of electronic and thermal Energies=      | -475.356517 |
| Sum of electronic and thermal Enthalpies=    | -475.355573 |
| Sum of electronic and thermal Free Energies= | -475.419322 |

---

### Rea-Ge (Singlet)

---

| Atomic<br>Number | Coordinates (Angstroms) |           |           |
|------------------|-------------------------|-----------|-----------|
|                  | X                       | Y         | Z         |
| 32               | -2.330448               | -0.087229 | -0.033838 |
| 14               | 0.559156                | 0.020890  | 0.008054  |
| 6                | -0.210568               | 1.602076  | 1.551191  |
| 6                | -0.803836               | 0.185355  | 1.374076  |
| 6                | -0.746773               | -0.234550 | -1.397544 |
| 6                | -0.049389               | -1.604843 | -1.561394 |
| 6                | 0.922102                | 1.714272  | 0.766598  |
| 6                | 1.062475                | -1.640856 | -0.740513 |
| 6                | -0.580900               | -2.686856 | -2.470230 |
| 1                | 0.051962                | -3.581863 | -2.471012 |
| 1                | -1.598116               | -2.981372 | -2.170443 |
| 1                | -0.652621               | -2.320568 | -3.504214 |
| 6                | 2.036567                | -2.754764 | -0.470665 |
| 1                | 2.035460                | -3.040264 | 0.591773  |
| 1                | 1.808014                | -3.655148 | -1.057455 |
| 1                | 3.064504                | -2.451356 | -0.715469 |
| 6                | -0.960827               | 0.553841  | -2.699565 |
| 1                | -0.024548               | 0.642799  | -3.273950 |
| 1                | -1.703942               | 0.071894  | -3.354358 |
| 1                | -1.316298               | 1.576689  | -2.507863 |
| 6                | -0.998081               | -0.610673 | 2.674702  |
| 1                | -0.073102               | -0.633678 | 3.273363  |
| 1                | -1.788655               | -0.176973 | 3.307252  |
| 1                | -1.278892               | -1.655974 | 2.480345  |
| 6                | -0.848438               | 2.646431  | 2.435452  |
| 1                | -0.284117               | 3.586022  | 2.449275  |
| 1                | -1.874733               | 2.862756  | 2.101711  |
| 1                | -0.925624               | 2.281055  | 3.469381  |
| 6                | 1.823199                | 2.893814  | 0.523440  |
| 1                | 1.840408                | 3.173373  | -0.540290 |
| 1                | 1.509820                | 3.778262  | 1.095026  |
| 1                | 2.860504                | 2.666169  | 0.807367  |

---

|                                 |          |
|---------------------------------|----------|
| Zero-point correction=          | 0.264996 |
| (Hartree/Particle)              |          |
| Thermal correction to Energy=   | 0.283454 |
| Thermal correction to Enthalpy= | 0.284398 |

|                                              |             |
|----------------------------------------------|-------------|
| Thermal correction to Gibbs Free Energy=     | 0.218905    |
| Sum of electronic and zero-point Energies=   | -475.306686 |
| Sum of electronic and thermal Energies=      | -475.288228 |
| Sum of electronic and thermal Enthalpies=    | -475.287284 |
| Sum of electronic and thermal Free Energies= | -475.352776 |

---

### Rea-Ge (Triplet)

---

| Atomic<br>Number | Coordinates (Angstroms) |           |           |
|------------------|-------------------------|-----------|-----------|
|                  | X                       | Y         | Z         |
| 32               | -2.291540               | -0.074638 | -0.037516 |
| 14               | 0.487573                | 0.022367  | 0.004055  |
| 6                | -0.236351               | 1.622812  | 1.597949  |
| 6                | -0.803977               | 0.203029  | 1.448624  |
| 6                | -0.743364               | -0.248473 | -1.478746 |
| 6                | -0.074195               | -1.625348 | -1.606837 |
| 6                | 0.860274                | 1.720707  | 0.764219  |
| 6                | 1.000815                | -1.645937 | -0.740062 |
| 6                | -0.577480               | -2.713303 | -2.519482 |
| 1                | 0.036383                | -3.619770 | -2.470064 |
| 1                | -1.611084               | -2.980039 | -2.256292 |
| 1                | -0.593063               | -2.367324 | -3.562872 |
| 6                | 1.993144                | -2.734173 | -0.439964 |
| 1                | 1.940950                | -3.043054 | 0.614464  |
| 1                | 1.822360                | -3.625334 | -1.058756 |
| 1                | 3.023626                | -2.396941 | -0.621244 |
| 6                | -0.912135               | 0.559461  | -2.764400 |
| 1                | 0.033358                | 0.609602  | -3.329656 |
| 1                | -1.664058               | 0.109544  | -3.430211 |
| 1                | -1.236250               | 1.585417  | -2.552124 |
| 6                | -0.952392               | -0.618987 | 2.727990  |
| 1                | -0.023418               | -0.601632 | 3.321858  |
| 1                | -1.755162               | -0.227579 | 3.370997  |
| 1                | -1.193973               | -1.665258 | 2.505004  |
| 6                | -0.843483               | 2.669808  | 2.495226  |
| 1                | -0.298347               | 3.619871  | 2.461504  |
| 1                | -1.886620               | 2.857918  | 2.203183  |
| 1                | -0.861845               | 2.322803  | 3.538249  |



|   |          |          |           |
|---|----------|----------|-----------|
| 6 | 1.782960 | 2.876358 | 0.495804  |
| 1 | 1.739176 | 3.186650 | -0.558586 |
| 1 | 1.533619 | 3.750090 | 1.112773  |
| 1 | 2.828763 | 2.610084 | 0.705114  |

---

|                                              |             |
|----------------------------------------------|-------------|
| Zero-point correction=                       | 0.264993    |
| (Hartree/Particle)                           |             |
| Thermal correction to Energy=                | 0.283415    |
| Thermal correction to Enthalpy=              | 0.284359    |
| Thermal correction to Gibbs Free Energy=     | 0.218710    |
| Sum of electronic and zero-point Energies=   | -475.278923 |
| Sum of electronic and thermal Energies=      | -475.260500 |
| Sum of electronic and thermal Enthalpies=    | -475.259556 |
| Sum of electronic and thermal Free Energies= | -475.325205 |

---

### Rea-Sn (Singlet)

---

| Atomic<br>Number | Coordinates (Angstroms) |           |           |
|------------------|-------------------------|-----------|-----------|
|                  | X                       | Y         | Z         |
| 14               | 0.455889                | 0.020492  | 0.003760  |
| 6                | -0.231269               | 1.615584  | 1.581726  |
| 6                | -0.849862               | 0.213842  | 1.423488  |
| 6                | -0.791573               | -0.263474 | -1.452758 |
| 6                | -0.071296               | -1.617916 | -1.591101 |
| 6                | 0.861402                | 1.714856  | 0.737890  |
| 6                | 1.000499                | -1.640617 | -0.715439 |
| 6                | -0.533513               | -2.703700 | -2.533453 |
| 1                | 0.110932                | -3.589962 | -2.500843 |
| 1                | -1.562330               | -3.014124 | -2.294949 |
| 1                | -0.550005               | -2.334075 | -3.568776 |
| 6                | 1.975473                | -2.742952 | -0.402536 |
| 1                | 1.932347                | -3.028130 | 0.659407  |
| 1                | 1.784002                | -3.646870 | -0.997811 |
| 1                | 3.009693                | -2.427419 | -0.602581 |
| 6                | -0.940805               | 0.542310  | -2.755050 |
| 1                | 0.028055                | 0.661843  | -3.268790 |
| 1                | -1.628078               | 0.055847  | -3.464958 |
| 1                | -1.330399               | 1.555497  | -2.574310 |

|    |           |           |           |
|----|-----------|-----------|-----------|
| 6  | -0.977113 | -0.602017 | 2.722003  |
| 1  | -0.016624 | -0.651980 | 3.262302  |
| 1  | -1.716865 | -0.167042 | 3.412421  |
| 1  | -1.287441 | -1.640507 | 2.531737  |
| 6  | -0.797642 | 2.664111  | 2.509233  |
| 1  | -0.209864 | 3.589506  | 2.506068  |
| 1  | -1.833854 | 2.910510  | 2.230822  |
| 1  | -0.832049 | 2.286909  | 3.541311  |
| 6  | 1.765413  | 2.883502  | 0.453807  |
| 1  | 1.738548  | 3.162952  | -0.609869 |
| 1  | 1.489619  | 3.772275  | 1.038249  |
| 1  | 2.811839  | 2.643297  | 0.690269  |
| 50 | -2.559597 | -0.085877 | -0.039332 |

---

|                                              |             |
|----------------------------------------------|-------------|
| Zero-point correction=                       | 0.264562    |
| (Hartree/Particle)                           |             |
| Thermal correction to Energy=                | 0.283133    |
| Thermal correction to Enthalpy=              | 0.284078    |
| Thermal correction to Gibbs Free Energy=     | 0.217991    |
| Sum of electronic and zero-point Energies=   | -474.927691 |
| Sum of electronic and thermal Energies=      | -474.909119 |
| Sum of electronic and thermal Enthalpies=    | -474.908175 |
| Sum of electronic and thermal Free Energies= | -474.974261 |

---

### Rea-Sn (Triplet)

---

| Atomic<br>Number | Coordinates (Angstroms) |           |           |
|------------------|-------------------------|-----------|-----------|
|                  | X                       | Y         | Z         |
| 14               | 0.409262                | 0.019781  | 0.002517  |
| 6                | -0.263161               | 1.634966  | 1.615670  |
| 6                | -0.831608               | 0.219173  | 1.494223  |
| 6                | -0.769675               | -0.265917 | -1.524958 |
| 6                | -0.100836               | -1.638833 | -1.625602 |
| 6                | 0.806051                | 1.724712  | 0.744902  |
| 6                | 0.946567                | -1.652749 | -0.724241 |
| 6                | -0.563000               | -2.723886 | -2.563563 |
| 1                | 0.049073                | -3.630718 | -2.491997 |
| 1                | -1.607071               | -2.992767 | -2.344836 |

|    |           |           |           |
|----|-----------|-----------|-----------|
| 1  | -0.535339 | -2.373415 | -3.605734 |
| 6  | 1.943852  | -2.730419 | -0.404347 |
| 1  | 1.882367  | -3.032687 | 0.651590  |
| 1  | 1.788663  | -3.626803 | -1.020259 |
| 1  | 2.973524  | -2.384285 | -0.575901 |
| 6  | -0.870646 | 0.544016  | -2.818907 |
| 1  | 0.104742  | 0.587434  | -3.334734 |
| 1  | -1.588085 | 0.098787  | -3.524870 |
| 1  | -1.196922 | 1.573495  | -2.626682 |
| 6  | -0.912376 | -0.599889 | 2.783911  |
| 1  | 0.047361  | -0.573142 | 3.329093  |
| 1  | -1.681566 | -0.211106 | 3.468374  |
| 1  | -1.155875 | -1.650055 | 2.581070  |
| 6  | -0.827567 | 2.680832  | 2.541979  |
| 1  | -0.278442 | 3.628684  | 2.491846  |
| 1  | -1.881118 | 2.877049  | 2.292480  |
| 1  | -0.807070 | 2.327568  | 3.583564  |
| 6  | 1.734630  | 2.870231  | 0.455437  |
| 1  | 1.681912  | 3.171758  | -0.601357 |
| 1  | 1.500234  | 3.751196  | 1.068794  |
| 1  | 2.780817  | 2.595652  | 0.655331  |
| 50 | -2.535167 | -0.081991 | -0.040856 |

---

|                                              |             |
|----------------------------------------------|-------------|
| Zero-point correction=                       | 0.263751    |
| (Hartree/Particle)                           |             |
| Thermal correction to Energy=                | 0.281810    |
| Thermal correction to Enthalpy=              | 0.282754    |
| Thermal correction to Gibbs Free Energy=     | 0.217396    |
| Sum of electronic and zero-point Energies=   | -474.898060 |
| Sum of electronic and thermal Energies=      | -474.880001 |
| Sum of electronic and thermal Enthalpies=    | -474.879056 |
| Sum of electronic and thermal Free Energies= | -474.944415 |

---

### Rea-Pb (Singlet)

---

| Atomic<br>Number | Coordinates (Angstroms) |          |          |
|------------------|-------------------------|----------|----------|
|                  | X                       | Y        | Z        |
| 14               | 0.421380                | 0.020114 | 0.002577 |

---

|    |           |           |           |
|----|-----------|-----------|-----------|
| 6  | -0.225400 | 1.618768  | 1.599292  |
| 6  | -0.851198 | 0.226059  | 1.445422  |
| 6  | -0.790559 | -0.275030 | -1.476628 |
| 6  | -0.064301 | -1.620459 | -1.608129 |
| 6  | 0.846930  | 1.715329  | 0.726992  |
| 6  | 0.986526  | -1.640742 | -0.705016 |
| 6  | -0.493499 | -2.705599 | -2.567444 |
| 1  | 0.154355  | -3.588703 | -2.519230 |
| 1  | -1.526930 | -3.022457 | -2.359667 |
| 1  | -0.481709 | -2.332814 | -3.601775 |
| 6  | 1.955683  | -2.742003 | -0.369810 |
| 1  | 1.894131  | -3.022205 | 0.692438  |
| 1  | 1.774927  | -3.648975 | -0.963722 |
| 1  | 2.993535  | -2.428280 | -0.552731 |
| 6  | -0.947637 | 0.541151  | -2.769977 |
| 1  | 0.022264  | 0.690194  | -3.275921 |
| 1  | -1.616770 | 0.047804  | -3.492613 |
| 1  | -1.360923 | 1.543973  | -2.581618 |
| 6  | -0.987508 | -0.602318 | 2.733509  |
| 1  | -0.024214 | -0.684206 | 3.266694  |
| 1  | -1.709639 | -0.158824 | 3.437282  |
| 1  | -1.323769 | -1.631313 | 2.533466  |
| 6  | -0.757603 | 2.667325  | 2.547528  |
| 1  | -0.168275 | 3.591462  | 2.525374  |
| 1  | -1.802131 | 2.916582  | 2.305564  |
| 1  | -0.756614 | 2.289132  | 3.579910  |
| 6  | 1.745772  | 2.882779  | 0.421020  |
| 1  | 1.692790  | 3.163119  | -0.641763 |
| 1  | 1.486699  | 3.772117  | 1.012664  |
| 1  | 2.797847  | 2.641004  | 0.630502  |
| 82 | -2.640627 | -0.086315 | -0.042254 |

---

|                                            |             |
|--------------------------------------------|-------------|
| Zero-point correction=                     | 0.264158    |
| (Hartree/Particle)                         |             |
| Thermal correction to Energy=              | 0.282894    |
| Thermal correction to Enthalpy=            | 0.283838    |
| Thermal correction to Gibbs Free Energy=   | 0.216689    |
| Sum of electronic and zero-point Energies= | -475.024775 |
| Sum of electronic and thermal Energies=    | -475.006038 |
| Sum of electronic and thermal Enthalpies=  | -475.005094 |

### Rea-Pb (Triplet)

---

| Atomic<br>Number | Coordinates (Angstroms) |           |           |
|------------------|-------------------------|-----------|-----------|
|                  | X                       | Y         | Z         |
| 14               | 0.367732                | 0.019174  | 0.001026  |
| 6                | -0.254166               | 1.637829  | 1.641955  |
| 6                | -0.816694               | 0.229946  | 1.532418  |
| 6                | -0.751712               | -0.275185 | -1.565022 |
| 6                | -0.090373               | -1.641076 | -1.651969 |
| 6                | 0.785333                | 1.729800  | 0.732980  |
| 6                | 0.926580                | -1.657943 | -0.713412 |
| 6                | -0.516033               | -2.723062 | -2.611470 |
| 1                | 0.092099                | -3.630828 | -2.517644 |
| 1                | -1.568201               | -2.991949 | -2.433503 |
| 1                | -0.447476               | -2.370919 | -3.651658 |
| 6                | 1.921154                | -2.730106 | -0.371390 |
| 1                | 1.833679                | -3.037553 | 0.681555  |
| 1                | 1.789759                | -3.624547 | -0.996321 |
| 1                | 2.953053                | -2.375452 | -0.513256 |
| 6                | -0.879225               | 0.533981  | -2.853654 |
| 1                | 0.093079                | 0.604257  | -3.375623 |
| 1                | -1.585462               | 0.070121  | -3.559407 |
| 1                | -1.230987               | 1.554424  | -2.659498 |
| 6                | -0.924253               | -0.591232 | 2.815490  |
| 1                | 0.033553                | -0.590344 | 3.368322  |
| 1                | -1.685540               | -0.184318 | 3.499034  |
| 1                | -1.191773               | -1.634824 | 2.609290  |
| 6                | -0.780014               | 2.681638  | 2.594074  |
| 1                | -0.233518               | 3.629847  | 2.522131  |
| 1                | -1.843290               | 2.878529  | 2.388728  |
| 1                | -0.715872               | 2.327289  | 3.634028  |
| 6                | 1.712070                | 2.870081  | 0.422218  |
| 1                | 1.630552                | 3.178033  | -0.631147 |
| 1                | 1.503501                | 3.749137  | 1.048116  |
| 1                | 2.762011                | 2.586189  | 0.589059  |
| 82               | -2.646035               | -0.084267 | -0.043512 |

---

|                                              |             |
|----------------------------------------------|-------------|
| Zero-point correction=                       | 0.262980    |
| (Hartree/Particle)                           |             |
| Thermal correction to Energy=                | 0.281301    |
| Thermal correction to Enthalpy=              | 0.282245    |
| Thermal correction to Gibbs Free Energy=     | 0.215561    |
| Sum of electronic and zero-point Energies=   | -474.992814 |
| Sum of electronic and thermal Energies=      | -474.974493 |
| Sum of electronic and thermal Enthalpies=    | -474.973549 |
| Sum of electronic and thermal Free Energies= | -475.040232 |

---

## C<sub>2</sub>H<sub>4</sub>

---

| Atomic<br>Number | Coordinates (Angstroms) |           |          |
|------------------|-------------------------|-----------|----------|
|                  | X                       | Y         | Z        |
| 6                | -2.044764               | 0.523063  | 0.000000 |
| 1                | -1.529213               | -0.435595 | 0.000000 |
| 1                | -3.132755               | 0.489690  | 0.000000 |
| 6                | -1.370870               | 1.690875  | 0.000000 |
| 1                | -1.886422               | 2.649534  | 0.000000 |
| 1                | -0.282880               | 1.724248  | 0.000000 |

---

|                                              |            |
|----------------------------------------------|------------|
| Zero-point correction=                       | 0.051324   |
| (Hartree/Particle)                           |            |
| Thermal correction to Energy=                | 0.054355   |
| Thermal correction to Enthalpy=              | 0.055299   |
| Thermal correction to Gibbs Free Energy=     | 0.029777   |
| Sum of electronic and zero-point Energies=   | -78.526885 |
| Sum of electronic and thermal Energies=      | -78.523854 |
| Sum of electronic and thermal Enthalpies=    | -78.522910 |
| Sum of electronic and thermal Free Energies= | -78.548432 |

---

## CH<sub>4</sub>

---

| Atomic<br>Number | Coordinates (Angstroms) |   |   |
|------------------|-------------------------|---|---|
|                  | X                       | Y | Z |

---

|   |           |           |           |
|---|-----------|-----------|-----------|
| 6 | -2.402400 | -2.045453 | -0.031449 |
| 1 | -2.037298 | -3.078116 | -0.031449 |
| 1 | -2.037281 | -1.529132 | 0.862857  |
| 1 | -2.037281 | -1.529132 | -0.925755 |
| 1 | -3.497697 | -2.045440 | -0.031449 |

---

|                                              |            |
|----------------------------------------------|------------|
| Zero-point correction=                       | 0.045240   |
| (Hartree/Particle)                           |            |
| Thermal correction to Energy=                | 0.048103   |
| Thermal correction to Enthalpy=              | 0.049047   |
| Thermal correction to Gibbs Free Energy=     | 0.025565   |
| Sum of electronic and zero-point Energies=   | -40.469232 |
| Sum of electronic and thermal Energies=      | -40.466369 |
| Sum of electronic and thermal Enthalpies=    | -40.465425 |
| Sum of electronic and thermal Free Energies= | -40.488907 |

---

## H<sub>2</sub>O

---

| Atomic<br>Number | Coordinates (Angstroms) |   |   |
|------------------|-------------------------|---|---|
|                  | X                       | Y | Z |

---

|   |          |          |           |
|---|----------|----------|-----------|
| 8 | 2.757322 | 0.126781 | -0.036124 |
| 1 | 3.734006 | 0.121936 | -0.036124 |
| 1 | 2.426729 | 1.045829 | -0.036124 |

---

|                                              |            |
|----------------------------------------------|------------|
| Zero-point correction=                       | 0.020772   |
| (Hartree/Particle)                           |            |
| Thermal correction to Energy=                | 0.023609   |
| Thermal correction to Enthalpy=              | 0.024553   |
| Thermal correction to Gibbs Free Energy=     | 0.002456   |
| Sum of electronic and zero-point Energies=   | -76.393544 |
| Sum of electronic and thermal Energies=      | -76.390708 |
| Sum of electronic and thermal Enthalpies=    | -76.389764 |
| Sum of electronic and thermal Free Energies= | -76.411860 |

---

## TS-C-C<sub>2</sub>H<sub>4</sub>

---

| Atomic<br>Number | Coordinates (Angstroms) |           |           |
|------------------|-------------------------|-----------|-----------|
|                  | X                       | Y         | Z         |
| 6                | 0.317084                | 0.046208  | -0.366125 |
| 6                | 0.164824                | -0.035948 | 2.433460  |
| 6                | 1.329539                | -0.042968 | 1.708500  |
| 1                | -0.345220               | -0.956440 | 2.706806  |
| 1                | -0.319633               | 0.896270  | 2.717005  |
| 1                | 1.883502                | 0.871822  | 1.518267  |
| 1                | 1.865333                | -0.968084 | 1.507061  |
| 6                | -0.349405               | -1.219330 | -0.916230 |
| 6                | -0.271389               | 1.302961  | -0.758201 |
| 14               | -0.970268               | -0.116011 | -2.332540 |
| 6                | -1.777731               | 1.622253  | -0.877211 |
| 6                | -2.383059               | 1.043632  | -1.970956 |
| 6                | -2.439636               | 2.455036  | 0.199868  |
| 1                | -3.516319               | 2.576690  | 0.036388  |
| 1                | -2.291146               | 1.990125  | 1.183747  |
| 1                | -1.988326               | 3.456405  | 0.247344  |
| 6                | -3.828114               | 1.070682  | -2.401500 |
| 1                | -4.290340               | 0.074296  | -2.347938 |
| 1                | -4.422278               | 1.745818  | -1.772419 |
| 1                | -3.925963               | 1.416219  | -3.439872 |
| 6                | 0.689455                | -1.730594 | -1.993997 |
| 6                | 0.365764                | -1.132281 | -3.192630 |
| 6                | 1.881049                | -2.575884 | -1.635325 |
| 1                | 2.550003                | -2.745636 | -2.486645 |
| 1                | 2.452299                | -2.079687 | -0.839684 |
| 1                | 1.563353                | -3.555162 | -1.248420 |
| 6                | 1.077996                | -1.136916 | -4.514900 |
| 1                | 1.450733                | -0.133353 | -4.766666 |
| 1                | 1.938305                | -1.819517 | -4.504646 |
| 1                | 0.414269                | -1.449489 | -5.332333 |
| 6                | 0.617111                | 2.543440  | -0.719468 |
| 1                | 0.341207                | 3.259312  | -1.507864 |
| 1                | 0.539646                | 3.075454  | 0.244682  |
| 1                | 1.664068                | 2.251025  | -0.863252 |
| 6                | -1.045258               | -2.273677 | -0.068267 |
| 1                | -1.437271               | -3.085682 | -0.697690 |

---



|    |           |           |          |
|----|-----------|-----------|----------|
| 1  | -0.353014 | -2.722216 | 0.660966 |
| 1  | -1.880682 | -1.839342 | 0.494885 |
| -1 | -0.10     | -0.43     | 0.12     |
| -2 | 0.03      | 0.26      | -0.01    |
| -3 | 0.09      | 0.52      | -0.05    |
| -4 | 0.05      | 0.23      | -0.02    |
| -5 | 0.03      | 0.15      | -0.02    |
| -6 | 0.05      | 0.17      | -0.04    |
| -7 | 0.05      | 0.25      | -0.07    |
| -8 | -0.02     | -0.11     | -0.02    |
| -9 | 0.13      | 0.07      | 0.05     |
| -0 | -0.08     | -0.15     | -0.18    |
| -1 | 0.01      | -0.02     | 0.07     |
| -2 | -0.03     | 0.00      | 0.05     |
| -3 | 0.01      | -0.03     | 0.00     |
| -4 | -0.01     | -0.05     | 0.00     |
| -5 | 0.00      | -0.04     | -0.02    |
| -6 | 0.04      | -0.01     | -0.01    |
| -7 | -0.02     | 0.01      | 0.02     |
| -8 | 0.00      | 0.03      | 0.02     |
| -9 | -0.02     | 0.02      | 0.05     |
| -0 | -0.02     | 0.00      | 0.00     |
| -1 | -0.02     | -0.05     | 0.01     |
| -2 | -0.03     | -0.06     | 0.00     |
| -3 | 0.01      | -0.02     | 0.01     |
| -4 | 0.01      | 0.01      | 0.03     |
| -5 | 0.03      | -0.02     | -0.02    |
| -6 | 0.00      | -0.04     | 0.00     |
| -7 | -0.02     | -0.03     | 0.04     |
| -8 | -0.01     | 0.00      | 0.04     |
| -9 | -0.01     | -0.01     | 0.03     |
| -0 | -0.03     | -0.03     | 0.06     |
| -1 | 0.08      | 0.09      | 0.04     |
| -2 | 0.00      | 0.07      | 0.07     |
| -3 | 0.12      | 0.04      | 0.08     |
| -4 | 0.06      | 0.14      | -0.03    |
| -5 | 0.03      | 0.03      | 0.04     |
| -6 | 0.02      | 0.10      | -0.01    |
| -7 | 0.06      | 0.05      | 0.12     |
| -8 | 0.04      | 0.03      | 0.05     |

---

Frequencies -- -290.5484  
Red. masses -- 9.7321  
Frc consts -- 0.4841  
IR Inten -- 4.5206  
Zero-point correction= 0.321798  
(Hartree/Particle)  
Thermal correction to Energy= 0.341599  
Thermal correction to Enthalpy= 0.342543  
Thermal correction to Gibbs Free Energy= 0.275407  
Sum of electronic and zero-point Energies= -588.046125  
Sum of electronic and thermal Energies= -588.026324  
Sum of electronic and thermal Enthalpies= -588.025380  
Sum of electronic and thermal Free Energies= -588.092516

---

### TS-Si-C<sub>2</sub>H<sub>4</sub>

---

| Atomic<br>Number | Coordinates (Angstroms) |           |           |
|------------------|-------------------------|-----------|-----------|
|                  | X                       | Y         | Z         |
| 14               | 0.662921                | 0.011493  | -0.466657 |
| 6                | -0.333425               | -0.000112 | 2.275486  |
| 6                | 1.013804                | -0.005124 | 1.978143  |
| 1                | 1.592400                | -0.925897 | 1.986838  |
| 1                | 1.601912                | 0.909207  | 1.994973  |
| 1                | -0.889364               | -0.926765 | 2.404216  |
| 1                | -0.879223               | 0.930869  | 2.411647  |
| 14               | -0.799704               | -0.002012 | -2.765778 |
| 6                | -0.423331               | -1.374266 | -1.468432 |
| 6                | 0.543749                | -1.933499 | -2.553780 |
| 6                | 0.411808                | -1.144313 | -3.677793 |
| 6                | -0.247130               | 1.433403  | -1.520029 |
| 6                | -1.741729               | 1.824765  | -1.654103 |
| 6                | -2.323418               | 1.084986  | -2.666120 |
| 6                | -2.385472               | 2.918990  | -0.834130 |
| 1                | -3.432657               | 3.082428  | -1.116657 |
| 1                | -2.349351               | 2.686480  | 0.239178  |
| 1                | -1.849121               | 3.868811  | -0.975209 |
| 6                | -3.722731               | 1.099157  | -3.220462 |

|    |           |           |           |
|----|-----------|-----------|-----------|
| 1  | -4.234192 | 0.138953  | -3.058253 |
| 1  | -4.341621 | 1.887024  | -2.770112 |
| 1  | -3.709666 | 1.270688  | -4.306862 |
| 6  | 0.688855  | 2.620613  | -1.816370 |
| 1  | 0.431746  | 3.108184  | -2.770154 |
| 1  | 0.630328  | 3.387853  | -1.028305 |
| 1  | 1.736199  | 2.296900  | -1.876734 |
| 6  | -1.424976 | -2.383960 | -0.893084 |
| 1  | -1.919793 | -2.944327 | -1.706347 |
| 1  | -0.948797 | -3.128393 | -0.235281 |
| 1  | -2.213566 | -1.887269 | -0.311744 |
| 6  | 1.494725  | -3.072058 | -2.295361 |
| 1  | 2.157654  | -3.273314 | -3.144947 |
| 1  | 2.115586  | -2.845299 | -1.415524 |
| 1  | 0.941504  | -3.994708 | -2.066936 |
| 6  | 1.177142  | -1.154320 | -4.971017 |
| 1  | 1.698257  | -0.197524 | -5.124057 |
| 1  | 1.931229  | -1.952516 | -4.996051 |
| 1  | 0.510477  | -1.294646 | -5.833216 |
| -1 | 0.11      | -0.12     | -0.09     |
| -2 | -0.15     | 0.42      | 0.05      |
| -3 | -0.19     | 0.42      | 0.09      |
| -4 | -0.10     | 0.22      | 0.05      |
| -5 | -0.12     | 0.19      | 0.05      |
| -6 | -0.15     | 0.41      | 0.05      |
| -7 | -0.14     | 0.38      | 0.06      |
| -8 | 0.02      | -0.06     | 0.01      |
| -9 | 0.01      | -0.08     | 0.02      |
| -0 | 0.02      | -0.05     | 0.02      |
| -1 | 0.02      | -0.04     | -0.02     |
| -2 | 0.00      | -0.05     | -0.01     |
| -3 | 0.02      | -0.05     | -0.01     |
| -4 | 0.01      | -0.05     | 0.00      |
| -5 | 0.02      | -0.03     | 0.00      |
| -6 | 0.02      | -0.03     | 0.00      |
| -7 | 0.03      | -0.03     | -0.01     |
| -8 | 0.02      | -0.03     | 0.00      |
| -9 | 0.00      | -0.02     | 0.02      |
| -0 | 0.00      | -0.01     | 0.02      |
| -1 | 0.00      | -0.01     | 0.02      |

|    |       |       |       |
|----|-------|-------|-------|
| -2 | -0.01 | -0.03 | 0.04  |
| -3 | -0.02 | -0.02 | 0.00  |
| -4 | 0.01  | -0.02 | -0.03 |
| -5 | -0.04 | -0.05 | 0.03  |
| -6 | -0.05 | 0.02  | -0.01 |
| -7 | -0.01 | -0.02 | 0.00  |
| -8 | -0.01 | 0.00  | 0.04  |
| -9 | -0.02 | -0.01 | -0.03 |
| -0 | -0.02 | -0.02 | -0.01 |
| -1 | 0.00  | -0.03 | 0.02  |
| -2 | 0.01  | -0.02 | 0.02  |
| -3 | -0.02 | -0.04 | 0.02  |
| -4 | 0.00  | -0.03 | 0.02  |
| -5 | 0.02  | -0.02 | -0.04 |
| -6 | 0.01  | -0.01 | -0.03 |
| -7 | 0.01  | 0.00  | -0.04 |
| -8 | 0.04  | -0.02 | -0.05 |

---

Frequencies -- -150.9485

Red. masses -- 7.0835

Frc consts -- 0.0951

IR Inten -- 2.0007

Zero-point correction= 0.319265

(Hartree/Particle)

Thermal correction to Energy= 0.340264

Thermal correction to Enthalpy= 0.341208

Thermal correction to Gibbs Free Energy= 0.270678

Sum of electronic and zero-point Energies= -553.917304

Sum of electronic and thermal Energies= -553.896305

Sum of electronic and thermal Enthalpies= -553.895361

Sum of electronic and thermal Free Energies= -553.965891

---

### TS-Ge-C<sub>2</sub>H<sub>4</sub>

---

| Atomic<br>Number | Coordinates (Angstroms) |           |           |
|------------------|-------------------------|-----------|-----------|
|                  | X                       | Y         | Z         |
| 32               | 0.565206                | -0.009929 | -0.261142 |
| 6                | -0.225373               | -0.001033 | 2.227247  |

---

|    |           |           |           |
|----|-----------|-----------|-----------|
| 6  | 1.153766  | -0.005545 | 1.888246  |
| 1  | 1.741040  | -0.916229 | 1.996045  |
| 1  | 1.745256  | 0.903280  | 1.988991  |
| 1  | -0.740921 | -0.928498 | 2.469530  |
| 1  | -0.735219 | 0.929362  | 2.466950  |
| 14 | -0.818764 | -0.003709 | -2.694254 |
| 6  | -0.469249 | -1.426447 | -1.432825 |
| 6  | 0.535665  | -1.931278 | -2.507213 |
| 6  | 0.403421  | -1.122917 | -3.616848 |
| 6  | -0.301930 | 1.446828  | -1.488687 |
| 6  | -1.789315 | 1.859869  | -1.653103 |
| 6  | -2.347680 | 1.088750  | -2.655418 |
| 6  | -2.441114 | 2.985502  | -0.887652 |
| 1  | -3.482061 | 3.143834  | -1.194971 |
| 1  | -2.424636 | 2.788575  | 0.192664  |
| 1  | -1.896046 | 3.926667  | -1.052648 |
| 6  | -3.726454 | 1.103472  | -3.259169 |
| 1  | -4.246370 | 0.146714  | -3.103721 |
| 1  | -4.358361 | 1.898379  | -2.840639 |
| 1  | -3.676725 | 1.260763  | -4.346809 |
| 6  | 0.676589  | 2.591874  | -1.806138 |
| 1  | 0.430039  | 3.073237  | -2.766533 |
| 1  | 0.653642  | 3.374999  | -1.032696 |
| 1  | 1.710146  | 2.226798  | -1.869655 |
| 6  | -1.493663 | -2.466636 | -0.961661 |
| 1  | -1.940635 | -2.978535 | -1.832907 |
| 1  | -1.050075 | -3.247888 | -0.326061 |
| 1  | -2.312652 | -2.003913 | -0.396768 |
| 6  | 1.495371  | -3.066196 | -2.265804 |
| 1  | 2.168728  | -3.239525 | -3.113155 |
| 1  | 2.105186  | -2.856032 | -1.374406 |
| 1  | 0.949314  | -3.999594 | -2.066358 |
| 6  | 1.175531  | -1.113774 | -4.907367 |
| 1  | 1.693175  | -0.153624 | -5.050311 |
| 1  | 1.933111  | -1.908637 | -4.939782 |
| 1  | 0.513092  | -1.248485 | -5.773997 |
| -1 | 0.09      | -0.10     | -0.13     |
| -2 | -0.07     | 0.54      | 0.15      |
| -3 | -0.14     | 0.37      | 0.24      |
| -4 | -0.08     | 0.10      | 0.17      |

|    |       |       |       |
|----|-------|-------|-------|
| -5 | -0.10 | 0.10  | 0.14  |
| -6 | -0.10 | 0.31  | 0.16  |
| -7 | -0.10 | 0.31  | 0.14  |
| -8 | -0.02 | -0.03 | 0.03  |
| -9 | -0.04 | -0.06 | 0.06  |
| -0 | -0.02 | -0.02 | 0.03  |
| -1 | -0.01 | 0.00  | -0.01 |
| -2 | -0.05 | -0.01 | 0.04  |
| -3 | -0.02 | -0.05 | 0.01  |
| -4 | -0.02 | -0.05 | 0.01  |
| -5 | -0.02 | -0.04 | 0.01  |
| -6 | -0.03 | -0.04 | 0.00  |
| -7 | -0.01 | -0.04 | 0.01  |
| -8 | -0.02 | -0.03 | 0.01  |
| -9 | -0.01 | -0.03 | 0.03  |
| -0 | -0.01 | -0.03 | 0.03  |
| -1 | -0.01 | -0.02 | 0.03  |
| -2 | -0.03 | -0.04 | 0.04  |
| -3 | -0.03 | 0.02  | 0.03  |
| -4 | 0.05  | 0.00  | -0.01 |
| -5 | -0.08 | -0.02 | 0.05  |
| -6 | -0.04 | 0.10  | 0.05  |
| -7 | -0.02 | -0.04 | 0.05  |
| -8 | 0.00  | -0.03 | 0.08  |
| -9 | -0.03 | -0.02 | 0.03  |
| -0 | -0.02 | -0.05 | 0.06  |
| -1 | -0.02 | 0.00  | 0.03  |
| -2 | -0.02 | 0.01  | 0.02  |
| -3 | -0.04 | 0.00  | 0.03  |
| -4 | -0.02 | 0.00  | 0.03  |
| -5 | 0.00  | 0.02  | -0.02 |
| -6 | -0.01 | 0.01  | -0.02 |
| -7 | 0.00  | 0.03  | -0.02 |
| -8 | 0.01  | 0.01  | -0.02 |

---

Frequencies -- -211.8959

Red. masses -- 9.7164

Frc consts -- 0.2570

IR Inten -- 16.2930

Zero-point correction=

0.318429

(Hartree/Particle)

|                                              |             |
|----------------------------------------------|-------------|
| Thermal correction to Energy=                | 0.339525    |
| Thermal correction to Enthalpy=              | 0.340469    |
| Thermal correction to Gibbs Free Energy=     | 0.269676    |
| Sum of electronic and zero-point Energies=   | -553.820189 |
| Sum of electronic and thermal Energies=      | -553.799093 |
| Sum of electronic and thermal Enthalpies=    | -553.798149 |
| Sum of electronic and thermal Free Energies= | -553.868942 |

---

### TS-Sn-C<sub>2</sub>H<sub>4</sub>

---

| Atomic<br>Number | Coordinates (Angstroms) |           |           |
|------------------|-------------------------|-----------|-----------|
|                  | X                       | Y         | Z         |
| 50               | -0.393930               | -0.050380 | 0.090523  |
| 6                | 0.214120                | -0.015361 | 2.300843  |
| 6                | 1.523966                | 0.036275  | 1.680428  |
| 1                | 2.128744                | -0.866657 | 1.633411  |
| 1                | 2.060725                | 0.981395  | 1.632289  |
| 1                | -0.150122               | -0.936314 | 2.754754  |
| 1                | -0.224273               | 0.883845  | 2.731816  |
| 14               | -0.432251               | 0.051052  | -2.838174 |
| 6                | -0.162164               | -1.471137 | -1.646299 |
| 6                | 1.112036                | -1.689277 | -2.495895 |
| 6                | 1.042035                | -0.850799 | -3.592252 |
| 6                | -0.246160               | 1.491035  | -1.549751 |
| 6                | -1.676897               | 1.881343  | -1.982960 |
| 6                | -2.047385               | 1.040971  | -3.013357 |
| 6                | -2.478740               | 2.949082  | -1.284973 |
| 1                | -3.491241               | 3.057624  | -1.690165 |
| 1                | -2.557934               | 2.712763  | -0.212389 |
| 1                | -1.972967               | 3.922651  | -1.357851 |
| 6                | -3.364915               | 0.916873  | -3.728405 |
| 1                | -3.796517               | -0.085640 | -3.589296 |
| 1                | -4.099463               | 1.647978  | -3.363467 |
| 1                | -3.254073               | 1.067316  | -4.811416 |
| 6                | 0.808072                | 2.604986  | -1.599399 |
| 1                | 0.758635                | 3.141950  | -2.563707 |
| 1                | 0.671066                | 3.356550  | -0.807264 |

|    |           |           |           |
|----|-----------|-----------|-----------|
| 1  | 1.824120  | 2.201693  | -1.498346 |
| 6  | -1.043011 | -2.726592 | -1.525581 |
| 1  | -1.223975 | -3.187047 | -2.511172 |
| 1  | -0.568910 | -3.491418 | -0.891233 |
| 1  | -2.017229 | -2.493217 | -1.076175 |
| 6  | 2.182938  | -2.697942 | -2.163299 |
| 1  | 2.976434  | -2.725254 | -2.919683 |
| 1  | 2.639768  | -2.467845 | -1.190660 |
| 1  | 1.753977  | -3.707495 | -2.086293 |
| 6  | 1.969312  | -0.691615 | -4.766650 |
| 1  | 2.374058  | 0.329235  | -4.827042 |
| 1  | 2.818275  | -1.387425 | -4.725337 |
| 1  | 1.437972  | -0.875537 | -5.712215 |
| -1 | -0.02     | -0.11     | 0.13      |
| -2 | 0.13      | 0.28      | -0.33     |
| -3 | 0.38      | 0.29      | -0.25     |
| -4 | 0.01      | 0.21      | -0.19     |
| -5 | -0.02     | 0.18      | -0.24     |
| -6 | -0.05     | 0.14      | -0.20     |
| -7 | -0.05     | 0.15      | -0.24     |
| -8 | -0.01     | 0.03      | -0.04     |
| -9 | -0.01     | 0.07      | -0.08     |
| -0 | -0.05     | 0.03      | -0.02     |
| -1 | -0.05     | 0.01      | -0.02     |
| -2 | -0.05     | 0.04      | -0.08     |
| -3 | 0.00      | 0.04      | -0.04     |
| -4 | 0.02      | 0.03      | 0.00      |
| -5 | 0.00      | 0.04      | -0.03     |
| -6 | 0.01      | 0.04      | -0.03     |
| -7 | 0.00      | 0.05      | -0.03     |
| -8 | 0.01      | 0.03      | -0.03     |
| -9 | 0.03      | 0.02      | 0.00      |
| -0 | 0.02      | 0.03      | 0.00      |
| -1 | 0.04      | 0.03      | 0.00      |
| -2 | 0.03      | 0.01      | 0.00      |
| -3 | -0.06     | 0.01      | -0.07     |
| -4 | -0.04     | -0.02     | -0.07     |
| -5 | -0.04     | 0.02      | -0.06     |
| -6 | -0.08     | 0.00      | -0.10     |
| -7 | 0.03      | 0.04      | -0.06     |



|    |       |       |       |
|----|-------|-------|-------|
| -8 | 0.04  | -0.04 | -0.02 |
| -9 | -0.02 | 0.07  | -0.06 |
| -0 | 0.10  | 0.06  | -0.09 |
| -1 | -0.06 | 0.03  | -0.02 |
| -2 | -0.06 | 0.03  | -0.01 |
| -3 | -0.06 | 0.03  | -0.03 |
| -4 | -0.05 | 0.02  | -0.02 |
| -5 | -0.04 | 0.00  | -0.03 |
| -6 | -0.04 | 0.00  | -0.03 |
| -7 | -0.04 | 0.00  | -0.03 |
| -8 | -0.05 | 0.01  | -0.03 |

---

Frequencies -- -203.1704

Red. masses -- 10.6267

Frc consts -- 0.2584

IR Inten -- 24.4337

Zero-point correction= 0.317661  
(Hartree/Particle)

Thermal correction to Energy= 0.338857

Thermal correction to Enthalpy= 0.339801

Thermal correction to Gibbs Free Energy= 0.268386

Sum of electronic and zero-point Energies= -553.435708

Sum of electronic and thermal Energies= -553.414511

Sum of electronic and thermal Enthalpies= -553.413567

Sum of electronic and thermal Free Energies= -553.484982

---

## TS-Pb-C<sub>2</sub>H<sub>4</sub>

---

| Atomic<br>Number | Coordinates (Angstroms) |           |          |
|------------------|-------------------------|-----------|----------|
|                  | X                       | Y         | Z        |
| 82               | 0.400014                | -0.011288 | 0.039602 |
| 6                | -0.133285               | -0.003352 | 2.357553 |
| 6                | 1.351948                | -0.002991 | 2.100110 |
| 1                | 1.929232                | -0.909385 | 2.288613 |
| 1                | 1.925924                | 0.907607  | 2.278981 |
| 1                | -0.555895               | -0.916192 | 2.782666 |
| 1                | -0.556395               | 0.908786  | 2.782559 |

|    |           |           |           |
|----|-----------|-----------|-----------|
| 14 | -0.837175 | 0.000765  | -2.706527 |
| 6  | -0.542504 | -1.494496 | -1.514147 |
| 6  | 0.504965  | -1.947324 | -2.548409 |
| 6  | 0.398413  | -1.107061 | -3.638320 |
| 6  | -0.355943 | 1.503387  | -1.580980 |
| 6  | -1.830869 | 1.916390  | -1.744967 |
| 6  | -2.383524 | 1.096586  | -2.711142 |
| 6  | -2.481998 | 3.041017  | -0.982131 |
| 1  | -3.525312 | 3.198327  | -1.279526 |
| 1  | -2.457828 | 2.831038  | 0.096317  |
| 1  | -1.937576 | 3.983415  | -1.138458 |
| 6  | -3.764305 | 1.089257  | -3.308274 |
| 1  | -4.272081 | 0.128564  | -3.138360 |
| 1  | -4.400589 | 1.882359  | -2.892723 |
| 1  | -3.724770 | 1.235439  | -4.397809 |
| 6  | 0.671682  | 2.604741  | -1.874099 |
| 1  | 0.459304  | 3.099764  | -2.837114 |
| 1  | 0.665817  | 3.386278  | -1.099957 |
| 1  | 1.690681  | 2.199928  | -1.922389 |
| 6  | -1.568470 | -2.543779 | -1.075311 |
| 1  | -2.010840 | -3.038820 | -1.959108 |
| 1  | -1.123197 | -3.334698 | -0.454538 |
| 1  | -2.387306 | -2.093567 | -0.500655 |
| 6  | 1.470062  | -3.077646 | -2.305242 |
| 1  | 2.153939  | -3.240619 | -3.145866 |
| 1  | 2.069999  | -2.863755 | -1.407501 |
| 1  | 0.932488  | -4.016782 | -2.112202 |
| 6  | 1.192199  | -1.082087 | -4.915865 |
| 1  | 1.710370  | -0.120493 | -5.045627 |
| 1  | 1.950539  | -1.876648 | -4.944295 |
| 1  | 0.543317  | -1.212186 | -5.793884 |
| -1 | -0.01     | -0.06     | 0.08      |
| -2 | 0.27      | 0.19      | -0.21     |
| -3 | 0.17      | 0.27      | -0.35     |
| -4 | -0.01     | 0.18      | -0.26     |
| -5 | -0.01     | 0.19      | -0.25     |
| -6 | -0.01     | 0.16      | -0.27     |
| -7 | -0.02     | 0.21      | -0.23     |
| -8 | 0.00      | 0.04      | -0.05     |
| -9 | -0.05     | 0.04      | -0.11     |

|    |       |       |       |
|----|-------|-------|-------|
| -0 | 0.01  | 0.04  | -0.06 |
| -1 | 0.03  | 0.04  | -0.02 |
| -2 | -0.02 | 0.09  | -0.08 |
| -3 | -0.06 | 0.05  | -0.03 |
| -4 | -0.05 | 0.03  | -0.02 |
| -5 | -0.06 | 0.05  | -0.03 |
| -6 | -0.07 | 0.06  | -0.02 |
| -7 | -0.07 | 0.05  | -0.04 |
| -8 | -0.05 | 0.05  | -0.03 |
| -9 | -0.05 | 0.01  | -0.03 |
| -0 | -0.04 | 0.01  | -0.03 |
| -1 | -0.06 | 0.01  | -0.03 |
| -2 | -0.05 | 0.00  | -0.03 |
| -3 | 0.03  | 0.04  | -0.07 |
| -4 | 0.04  | -0.02 | -0.02 |
| -5 | 0.00  | 0.07  | -0.06 |
| -6 | 0.10  | 0.05  | -0.11 |
| -7 | -0.07 | 0.01  | -0.09 |
| -8 | -0.06 | -0.04 | -0.09 |
| -9 | -0.05 | 0.02  | -0.08 |
| -0 | -0.10 | 0.00  | -0.12 |
| -1 | 0.01  | 0.04  | -0.04 |
| -2 | 0.02  | 0.05  | -0.03 |
| -3 | 0.01  | 0.05  | -0.05 |
| -4 | 0.01  | 0.03  | -0.04 |
| -5 | 0.04  | 0.03  | -0.01 |
| -6 | 0.04  | 0.03  | -0.01 |
| -7 | 0.05  | 0.03  | -0.01 |
| -8 | 0.04  | 0.03  | -0.01 |

---

Frequencies -- -186.1464

Red. masses -- 8.4256

Frc consts -- 0.1720

IR Inten -- 13.2122

Zero-point correction= 0.316684

(Hartree/Particle)

Thermal correction to Energy= 0.338024

Thermal correction to Enthalpy= 0.338969

Thermal correction to Gibbs Free Energy= 0.266793

Sum of electronic and zero-point Energies= -553.505491

Sum of electronic and thermal Energies= -553.484150  
Sum of electronic and thermal Enthalpies= -553.483206  
Sum of electronic and thermal Free Energies= -553.555382

---

## TS-C-CH<sub>4</sub>

---

| Atomic<br>Number | Coordinates (Angstroms) |           |           |
|------------------|-------------------------|-----------|-----------|
|                  | X                       | Y         | Z         |
| 6                | 1.181500                | 0.081754  | 0.689818  |
| 1                | 1.979461                | 0.080345  | 1.687141  |
| 6                | 1.721701                | 0.088277  | 2.994533  |
| 1                | 0.711244                | -0.191790 | 3.291554  |
| 1                | 2.462074                | -0.644079 | 3.335364  |
| 1                | 1.972425                | 1.110358  | 3.293173  |
| 6                | 0.341507                | -1.154388 | 0.288490  |
| 6                | 0.409271                | 1.307918  | 0.309041  |
| 14               | -0.623127               | 0.014363  | -0.884814 |
| 6                | -1.048565               | 1.596892  | 0.784822  |
| 6                | -1.972647               | 1.024079  | -0.060639 |
| 6                | -1.304960               | 2.378982  | 2.052485  |
| 1                | -0.834015               | 1.885002  | 2.913692  |
| 1                | -2.374973               | 2.490228  | 2.262590  |
| 1                | -0.866197               | 3.384571  | 1.983973  |
| 6                | -3.475103               | 1.003122  | 0.006387  |
| 1                | -3.859999               | -0.018170 | 0.139962  |
| 1                | -3.855810               | 1.614477  | 0.835343  |
| 1                | -3.915682               | 1.392200  | -0.922084 |
| 6                | 0.960410                | -1.729908 | -1.036264 |
| 6                | 0.295049                | -1.136157 | -2.085354 |
| 6                | 2.146993                | -2.655801 | -1.058569 |
| 1                | 2.484029                | -2.890477 | -2.075041 |
| 1                | 2.981190                | -2.191914 | -0.514143 |
| 1                | 1.913483                | -3.601741 | -0.548452 |
| 6                | 0.496254                | -1.259646 | -3.569683 |
| 1                | 0.789918                | -0.297869 | -4.014248 |
| 1                | 1.276144                | -1.993741 | -3.813278 |
| 1                | -0.427397               | -1.576886 | -4.073724 |
| 6                | -0.167779               | -2.171062 | 1.303265  |

|    |           |           |           |
|----|-----------|-----------|-----------|
| 1  | -0.751169 | -2.961242 | 0.811232  |
| 1  | 0.660434  | -2.655982 | 1.844161  |
| 1  | -0.813267 | -1.692932 | 2.051772  |
| 6  | 1.221426  | 2.575818  | 0.054919  |
| 1  | 0.676328  | 3.286838  | -0.581803 |
| 1  | 1.457576  | 3.096664  | 0.997631  |
| 1  | 2.170935  | 2.325942  | -0.430942 |
| -1 | -0.08     | -0.09     | 0.06      |
| -2 | 0.62      | 0.49      | -0.53     |
| -3 | -0.02     | 0.03      | 0.03      |
| -4 | -0.05     | -0.05     | 0.05      |
| -5 | 0.15      | 0.13      | -0.09     |
| -6 | 0.07      | 0.09      | -0.08     |
| -7 | 0.01      | -0.01     | -0.02     |
| -8 | 0.03      | 0.02      | 0.00      |
| -9 | 0.00      | 0.00      | -0.01     |
| -0 | 0.00      | 0.00      | 0.01      |
| -1 | 0.00      | 0.00      | 0.00      |
| -2 | 0.00      | 0.00      | 0.00      |
| -3 | 0.00      | 0.00      | 0.00      |
| -4 | 0.00      | 0.00      | 0.00      |
| -5 | 0.00      | 0.00      | 0.00      |
| -6 | 0.00      | 0.00      | 0.00      |
| -7 | 0.00      | 0.00      | 0.00      |
| -8 | 0.00      | 0.00      | 0.00      |
| -9 | 0.00      | 0.00      | 0.00      |
| -0 | 0.00      | 0.00      | 0.00      |
| -1 | 0.00      | 0.01      | 0.00      |
| -2 | 0.00      | 0.00      | 0.00      |
| -3 | 0.00      | 0.00      | 0.00      |
| -4 | 0.01      | 0.00      | 0.00      |
| -5 | 0.00      | 0.00      | 0.00      |
| -6 | 0.00      | 0.00      | 0.00      |
| -7 | 0.00      | 0.00      | 0.00      |
| -8 | 0.00      | 0.00      | 0.00      |
| -9 | 0.00      | 0.00      | 0.00      |
| -0 | 0.00      | 0.00      | 0.00      |
| -1 | 0.00      | 0.01      | -0.01     |
| -2 | 0.00      | 0.00      | 0.01      |
| -3 | 0.00      | 0.00      | -0.01     |

|    |       |      |       |
|----|-------|------|-------|
| -4 | 0.00  | 0.00 | 0.00  |
| -5 | 0.00  | 0.00 | 0.00  |
| -6 | 0.01  | 0.00 | 0.01  |
| -7 | -0.01 | 0.01 | -0.02 |

-----

Frequencies -- -1066.1394

Red. masses -- 1.2589

Frc consts -- 0.8431

IR Inten -- 113.4337

Zero-point correction= 0.312906

(Hartree/Particle)

Thermal correction to Energy= 0.332762

Thermal correction to Enthalpy= 0.333706

Thermal correction to Gibbs Free Energy= 0.266285

Sum of electronic and zero-point Energies= -549.971787

Sum of electronic and thermal Energies= -549.951931

Sum of electronic and thermal Enthalpies= -549.950987

Sum of electronic and thermal Free Energies= -550.018408

-----

## TS-Si-CH<sub>4</sub>

-----

| Atomic<br>Number | Coordinates (Angstroms) |           |           |
|------------------|-------------------------|-----------|-----------|
|                  | X                       | Y         | Z         |
| 14               | -0.414792               | 0.129557  | 0.072771  |
| 1                | 1.131050                | 0.305330  | -0.030715 |
| 6                | 2.220811                | 2.024207  | -0.074585 |
| 1                | 1.615506                | 1.963504  | -0.972703 |
| 1                | 3.173197                | 2.557468  | -0.131767 |
| 1                | 1.743572                | 1.934406  | 0.895673  |
| 6                | -1.328367               | -0.835520 | 1.519521  |
| 6                | -1.384280               | -0.945001 | -1.247360 |
| 14               | -2.392705               | -1.789756 | 0.196316  |
| 6                | -0.866751               | -2.274511 | 1.903506  |
| 6                | -1.640842               | -3.186681 | 1.214503  |
| 6                | 0.248031                | -2.544738 | 2.883926  |
| 1                | 0.399291                | -3.617297 | 3.054618  |
| 1                | 1.195601                | -2.114451 | 2.527915  |
| 1                | 0.030004                | -2.075340 | 3.853731  |

|    |           |           |           |
|----|-----------|-----------|-----------|
| 6  | -1.608242 | -4.690180 | 1.203015  |
| 1  | -1.355024 | -5.078242 | 0.205569  |
| 1  | -0.875175 | -5.094038 | 1.914255  |
| 1  | -2.590812 | -5.107772 | 1.465292  |
| 6  | -1.822172 | -0.006082 | 2.715967  |
| 1  | -2.570645 | -0.560640 | 3.302981  |
| 1  | -0.997931 | 0.258272  | 3.396800  |
| 1  | -2.284242 | 0.934659  | 2.388696  |
| 6  | -2.778087 | -0.392954 | -1.655420 |
| 6  | -3.735871 | -0.956018 | -0.837914 |
| 6  | -2.947843 | 0.629147  | -2.750351 |
| 1  | -3.991876 | 0.934740  | -2.883639 |
| 1  | -2.346057 | 1.524141  | -2.533236 |
| 1  | -2.586217 | 0.228802  | -3.708778 |
| 6  | -5.213453 | -0.690667 | -0.750171 |
| 1  | -5.481623 | -0.274583 | 0.232492  |
| 1  | -5.548724 | 0.022552  | -1.514959 |
| 1  | -5.796642 | -1.613632 | -0.874830 |
| 6  | -0.598480 | -1.624973 | -2.379556 |
| 1  | -1.223967 | -2.370431 | -2.896576 |
| 1  | -0.253266 | -0.904907 | -3.137485 |
| 1  | 0.289820  | -2.148386 | -2.001428 |
| -1 | -0.01     | 0.01      | 0.01      |
| -2 | -0.17     | 0.47      | 0.29      |
| -3 | 0.01      | -0.06     | -0.03     |
| -4 | -0.21     | 0.19      | 0.34      |
| -5 | 0.28      | -0.17     | -0.40     |
| -6 | -0.24     | 0.18      | 0.32      |
| -7 | 0.01      | 0.01      | -0.01     |
| -8 | 0.02      | -0.01     | -0.01     |
| -9 | 0.00      | 0.00      | -0.01     |
| -0 | 0.00      | -0.01     | 0.00      |
| -1 | 0.00      | -0.01     | 0.00      |
| -2 | 0.00      | 0.00      | 0.00      |
| -3 | 0.00      | 0.00      | 0.00      |
| -4 | 0.00      | 0.00      | 0.00      |
| -5 | 0.00      | 0.00      | 0.00      |
| -6 | 0.00      | 0.00      | 0.00      |
| -7 | 0.00      | 0.00      | 0.00      |
| -8 | 0.00      | 0.00      | 0.00      |

|    |       |      |       |
|----|-------|------|-------|
| -9 | 0.00  | 0.00 | 0.00  |
| -0 | 0.00  | 0.01 | -0.01 |
| -1 | -0.01 | 0.00 | -0.01 |
| -2 | 0.01  | 0.00 | 0.00  |
| -3 | 0.00  | 0.01 | -0.01 |
| -4 | 0.00  | 0.00 | 0.00  |
| -5 | 0.00  | 0.00 | 0.00  |
| -6 | 0.00  | 0.00 | 0.00  |
| -7 | 0.00  | 0.00 | 0.00  |
| -8 | 0.00  | 0.00 | 0.00  |
| -9 | 0.00  | 0.00 | 0.00  |
| -0 | 0.00  | 0.00 | 0.00  |
| -1 | 0.00  | 0.00 | 0.00  |
| -2 | 0.00  | 0.00 | 0.00  |
| -3 | 0.00  | 0.00 | 0.00  |
| -4 | 0.00  | 0.00 | -0.01 |
| -5 | 0.00  | 0.00 | -0.01 |
| -6 | 0.00  | 0.00 | 0.01  |
| -7 | 0.00  | 0.00 | -0.02 |

---

Frequencies -- -599.6634

Red. masses -- 1.0864

Frc consts -- 0.2302

IR Inten -- 1.8357

Zero-point correction= 0.307250  
(Hartree/Particle)

Thermal correction to Energy= 0.328100

Thermal correction to Enthalpy= 0.329044

Thermal correction to Gibbs Free Energy= 0.258349

Sum of electronic and zero-point Energies= -515.761037

Sum of electronic and thermal Energies= -515.740186

Sum of electronic and thermal Enthalpies= -515.739242

Sum of electronic and thermal Free Energies= -515.809937

---

### TS-Ge-CH<sub>4</sub>

---

| Atomic<br>Number | Coordinates (Angstroms) |   |   |
|------------------|-------------------------|---|---|
|                  | X                       | Y | Z |

---



|    |           |           |           |
|----|-----------|-----------|-----------|
| 32 | -0.337670 | 0.195621  | 0.070452  |
| 1  | 1.307614  | 0.203465  | -0.044905 |
| 6  | 2.290973  | 1.988350  | -0.065040 |
| 1  | 1.698781  | 1.898248  | -0.968639 |
| 1  | 3.210351  | 2.579660  | -0.112627 |
| 1  | 1.821697  | 1.856994  | 0.903529  |
| 6  | -1.354550 | -0.833740 | 1.549729  |
| 6  | -1.407110 | -0.932737 | -1.281997 |
| 14 | -2.373897 | -1.769315 | 0.190860  |
| 6  | -0.872833 | -2.260179 | 1.927419  |
| 6  | -1.616431 | -3.173428 | 1.204540  |
| 6  | 0.227525  | -2.527968 | 2.924405  |
| 1  | 0.390777  | -3.600223 | 3.085944  |
| 1  | 1.175129  | -2.082202 | 2.587527  |
| 1  | -0.011344 | -2.070871 | 3.895128  |
| 6  | -1.564196 | -4.676260 | 1.175754  |
| 1  | -1.301966 | -5.050383 | 0.175264  |
| 1  | -0.830030 | -5.079303 | 1.886509  |
| 1  | -2.543027 | -5.108987 | 1.428594  |
| 6  | -1.879577 | 0.000921  | 2.726965  |
| 1  | -2.632924 | -0.555520 | 3.306931  |
| 1  | -1.072068 | 0.281999  | 3.421024  |
| 1  | -2.348119 | 0.933044  | 2.383010  |
| 6  | -2.801003 | -0.391551 | -1.669386 |
| 6  | -3.741934 | -0.955620 | -0.830652 |
| 6  | -2.999265 | 0.620312  | -2.769891 |
| 1  | -4.048917 | 0.910925  | -2.892345 |
| 1  | -2.407751 | 1.525931  | -2.567617 |
| 1  | -2.643364 | 0.218907  | -3.729918 |
| 6  | -5.220841 | -0.702588 | -0.725846 |
| 1  | -5.484323 | -0.291508 | 0.260129  |
| 1  | -5.570730 | 0.008708  | -1.486206 |
| 1  | -5.796898 | -1.630723 | -0.847311 |
| 6  | -0.615589 | -1.608146 | -2.411755 |
| 1  | -1.230431 | -2.368030 | -2.922031 |
| 1  | -0.285826 | -0.888270 | -3.176758 |
| 1  | 0.282566  | -2.115548 | -2.034714 |
| -1 | 0.00      | 0.00      | 0.00      |
| -2 | 0.00      | 0.60      | -0.24     |
| -3 | 0.00      | -0.06     | 0.03      |

|    |       |       |       |
|----|-------|-------|-------|
| -4 | 0.18  | 0.19  | -0.35 |
| -5 | -0.22 | -0.17 | 0.36  |
| -6 | 0.20  | 0.20  | -0.32 |
| -7 | 0.00  | 0.00  | 0.01  |
| -8 | -0.01 | -0.01 | 0.01  |
| -9 | 0.00  | 0.00  | 0.00  |
| -0 | 0.00  | -0.01 | 0.00  |
| -1 | 0.00  | -0.01 | 0.00  |
| -2 | 0.00  | 0.00  | 0.00  |
| -3 | 0.00  | 0.00  | 0.00  |
| -4 | 0.00  | 0.00  | 0.00  |
| -5 | 0.00  | 0.00  | 0.00  |
| -6 | 0.00  | 0.00  | 0.00  |
| -7 | 0.00  | 0.00  | 0.00  |
| -8 | 0.00  | 0.00  | 0.00  |
| -9 | 0.00  | 0.00  | 0.00  |
| -0 | 0.00  | 0.01  | 0.00  |
| -1 | 0.01  | 0.00  | 0.01  |
| -2 | 0.00  | 0.00  | 0.00  |
| -3 | 0.00  | 0.00  | 0.00  |
| -4 | 0.00  | 0.00  | 0.00  |
| -5 | 0.00  | 0.00  | 0.00  |
| -6 | 0.00  | 0.00  | 0.00  |
| -7 | 0.00  | 0.00  | 0.00  |
| -8 | 0.00  | 0.00  | 0.00  |
| -9 | 0.00  | 0.00  | 0.00  |
| -0 | 0.00  | 0.00  | 0.00  |
| -1 | 0.00  | 0.00  | 0.00  |
| -2 | 0.00  | 0.00  | 0.00  |
| -3 | 0.00  | 0.00  | 0.00  |
| -4 | 0.00  | 0.00  | 0.00  |
| -5 | 0.00  | 0.00  | 0.01  |
| -6 | 0.00  | 0.00  | 0.00  |
| -7 | 0.00  | 0.00  | 0.01  |

---

Frequencies -- -721.2871

Red. masses -- 1.0635

Frc consts -- 0.3260

IR Inten -- 19.6863

Zero-point correction= 0.305733

(Hartree/Particle)

|                                              |             |
|----------------------------------------------|-------------|
| Thermal correction to Energy=                | 0.327034    |
| Thermal correction to Enthalpy=              | 0.327978    |
| Thermal correction to Gibbs Free Energy=     | 0.255959    |
| Sum of electronic and zero-point Energies=   | -515.660229 |
| Sum of electronic and thermal Energies=      | -515.638929 |
| Sum of electronic and thermal Enthalpies=    | -515.637984 |
| Sum of electronic and thermal Free Energies= | -515.710003 |

---

## TS-Sn-CH<sub>4</sub>

---

| Atomic<br>Number | Coordinates (Angstroms) |           |           |
|------------------|-------------------------|-----------|-----------|
|                  | X                       | Y         | Z         |
| 50               | -0.265173               | 0.416028  | 0.091183  |
| 1                | 1.474963                | -0.101457 | -0.040112 |
| 6                | 2.870965                | 1.523383  | -0.011160 |
| 1                | 2.295689                | 1.531718  | -0.928070 |
| 1                | 3.902987                | 1.881384  | -0.038638 |
| 1                | 2.378952                | 1.435785  | 0.948727  |
| 6                | -1.484013               | -0.739023 | 1.603654  |
| 6                | -1.509950               | -0.764641 | -1.358347 |
| 14               | -2.335261               | -1.697182 | 0.153298  |
| 6                | -0.900627               | -2.114512 | 1.984346  |
| 6                | -1.473635               | -3.060758 | 1.153501  |
| 6                | 0.130127                | -2.311278 | 3.067470  |
| 1                | 0.405461                | -3.364189 | 3.199019  |
| 1                | 1.043484                | -1.742649 | 2.836412  |
| 1                | -0.244362               | -1.933489 | 4.029635  |
| 6                | -1.245241               | -4.544437 | 1.063282  |
| 1                | -0.880001               | -4.833841 | 0.066654  |
| 1                | -0.511758               | -4.894285 | 1.802491  |
| 1                | -2.178310               | -5.101554 | 1.231894  |
| 6                | -2.168810               | 0.043732  | 2.732178  |
| 1                | -2.917769               | -0.575865 | 3.252874  |
| 1                | -1.449037               | 0.389474  | 3.489834  |
| 1                | -2.687454               | 0.934225  | 2.350891  |
| 6                | -2.954430               | -0.357730 | -1.684092 |
| 6                | -3.806032               | -1.030622 | -0.827993 |

|    |           |           |           |
|----|-----------|-----------|-----------|
| 6  | -3.299411 | 0.637094  | -2.764618 |
| 1  | -4.379691 | 0.794543  | -2.862798 |
| 1  | -2.824368 | 1.607592  | -2.556161 |
| 1  | -2.914464 | 0.300169  | -3.737841 |
| 6  | -5.302762 | -0.958869 | -0.693853 |
| 1  | -5.599915 | -0.621413 | 0.310117  |
| 1  | -5.748806 | -0.268531 | -1.422951 |
| 1  | -5.764068 | -1.945285 | -0.845896 |
| 6  | -0.715231 | -1.373372 | -2.524512 |
| 1  | -1.275632 | -2.195490 | -3.000958 |
| 1  | -0.502070 | -0.630402 | -3.308328 |
| 1  | 0.248454  | -1.784276 | -2.195058 |
| -1 | 0.00      | 0.00      | 0.00      |
| -2 | 0.47      | -0.40     | -0.17     |
| -3 | -0.03     | 0.04      | 0.03      |
| -4 | 0.03      | -0.27     | -0.34     |
| -5 | -0.01     | 0.29      | 0.36      |
| -6 | 0.03      | -0.28     | -0.32     |
| -7 | 0.00      | -0.01     | 0.01      |
| -8 | 0.01      | 0.01      | 0.00      |
| -9 | 0.00      | 0.00      | 0.00      |
| -0 | 0.00      | 0.00      | 0.00      |
| -1 | 0.00      | 0.00      | 0.00      |
| -2 | 0.00      | 0.00      | 0.00      |
| -3 | 0.00      | 0.00      | 0.00      |
| -4 | 0.00      | 0.00      | 0.00      |
| -5 | 0.00      | 0.00      | 0.00      |
| -6 | 0.00      | 0.00      | 0.00      |
| -7 | 0.00      | 0.00      | 0.00      |
| -8 | 0.00      | 0.00      | 0.00      |
| -9 | 0.00      | 0.00      | 0.00      |
| -0 | 0.00      | 0.00      | 0.00      |
| -1 | 0.00      | -0.01     | 0.00      |
| -2 | 0.00      | 0.00      | 0.00      |
| -3 | 0.00      | 0.00      | 0.00      |
| -4 | 0.00      | 0.00      | 0.00      |
| -5 | 0.00      | 0.00      | 0.00      |
| -6 | 0.00      | 0.00      | 0.00      |
| -7 | 0.00      | 0.00      | 0.00      |
| -8 | 0.00      | 0.00      | 0.00      |

|    |      |      |      |
|----|------|------|------|
| -9 | 0.00 | 0.00 | 0.00 |
| -0 | 0.00 | 0.00 | 0.00 |
| -1 | 0.00 | 0.00 | 0.00 |
| -2 | 0.00 | 0.00 | 0.00 |
| -3 | 0.00 | 0.00 | 0.00 |
| -4 | 0.00 | 0.00 | 0.00 |
| -5 | 0.00 | 0.00 | 0.00 |
| -6 | 0.00 | 0.00 | 0.00 |
| -7 | 0.00 | 0.00 | 0.01 |

---

Frequencies -- -688.0579

Red. masses -- 1.0523

Frc consts -- 0.2935

IR Inten -- 93.2214

Zero-point correction= 0.304462

(Hartree/Particle)

Thermal correction to Energy= 0.326171

Thermal correction to Enthalpy= 0.327115

Thermal correction to Gibbs Free Energy= 0.253516

Sum of electronic and zero-point Energies= -515.275189

Sum of electronic and thermal Energies= -515.253480

Sum of electronic and thermal Enthalpies= -515.252535

Sum of electronic and thermal Free Energies= -515.326134

---

## TS-Pb-CH<sub>4</sub>

---

| Atomic<br>Number | Coordinates (Angstroms) |           |           |
|------------------|-------------------------|-----------|-----------|
|                  | X                       | Y         | Z         |
| 82               | -0.087365               | 0.304445  | 0.038436  |
| 1                | 1.810097                | 0.353423  | -0.113669 |
| 6                | 2.267529                | 2.418353  | -0.084278 |
| 1                | 1.746554                | 2.167654  | -0.998700 |
| 1                | 2.991967                | 3.235818  | -0.120293 |
| 1                | 1.892325                | 2.120490  | 0.886250  |
| 6                | -1.322894               | -0.908050 | 1.616681  |
| 6                | -1.408345               | -1.013744 | -1.367252 |
| 14               | -2.310077               | -1.751328 | 0.184986  |
| 6                | -0.901215               | -2.342218 | 1.979882  |

|    |           |           |           |
|----|-----------|-----------|-----------|
| 6  | -1.636894 | -3.210130 | 1.190895  |
| 6  | 0.141025  | -2.675694 | 3.018916  |
| 1  | 0.250765  | -3.756305 | 3.168146  |
| 1  | 1.120852  | -2.268550 | 2.727194  |
| 1  | -0.115420 | -2.221911 | 3.986597  |
| 6  | -1.637640 | -4.713017 | 1.133440  |
| 1  | -1.364731 | -5.079295 | 0.132781  |
| 1  | -0.938226 | -5.156735 | 1.855132  |
| 1  | -2.638032 | -5.113994 | 1.353200  |
| 6  | -1.867989 | -0.052272 | 2.767158  |
| 1  | -2.677179 | -0.573099 | 3.306667  |
| 1  | -1.088202 | 0.189359  | 3.505647  |
| 1  | -2.276938 | 0.901628  | 2.405636  |
| 6  | -2.782224 | -0.430746 | -1.715317 |
| 6  | -3.699075 | -0.920460 | -0.802574 |
| 6  | -2.997284 | 0.548166  | -2.842740 |
| 1  | -4.042636 | 0.863515  | -2.936789 |
| 1  | -2.376870 | 1.444811  | -2.689386 |
| 1  | -2.684794 | 0.110450  | -3.801513 |
| 6  | -5.161392 | -0.608229 | -0.640662 |
| 1  | -5.369584 | -0.176074 | 0.349443  |
| 1  | -5.515983 | 0.105766  | -1.396801 |
| 1  | -5.776775 | -1.515181 | -0.725621 |
| 6  | -0.673293 | -1.774580 | -2.479044 |
| 1  | -1.326314 | -2.549886 | -2.919055 |
| 1  | -0.355606 | -1.116068 | -3.301830 |
| 1  | 0.224659  | -2.286330 | -2.105485 |
| -1 | 0.00      | 0.00      | 0.00      |
| -2 | 0.68      | 0.11      | 0.25      |
| -3 | -0.03     | -0.02     | -0.04     |
| -4 | 0.04      | 0.21      | 0.34      |
| -5 | -0.01     | -0.21     | -0.31     |
| -6 | 0.04      | 0.23      | 0.32      |
| -7 | 0.00      | 0.00      | -0.01     |
| -8 | 0.00      | -0.01     | 0.00      |
| -9 | 0.00      | 0.00      | 0.00      |
| -0 | 0.00      | 0.00      | 0.00      |
| -1 | 0.00      | 0.00      | 0.00      |
| -2 | 0.00      | 0.00      | 0.00      |
| -3 | 0.00      | 0.00      | 0.00      |

|    |      |      |       |
|----|------|------|-------|
| -4 | 0.00 | 0.00 | 0.00  |
| -5 | 0.00 | 0.00 | 0.00  |
| -6 | 0.00 | 0.00 | 0.00  |
| -7 | 0.00 | 0.00 | 0.00  |
| -8 | 0.00 | 0.00 | 0.00  |
| -9 | 0.00 | 0.00 | 0.00  |
| -0 | 0.00 | 0.00 | 0.00  |
| -1 | 0.00 | 0.01 | 0.00  |
| -2 | 0.00 | 0.00 | 0.00  |
| -3 | 0.00 | 0.00 | 0.00  |
| -4 | 0.00 | 0.00 | 0.00  |
| -5 | 0.00 | 0.00 | 0.00  |
| -6 | 0.00 | 0.00 | 0.00  |
| -7 | 0.00 | 0.00 | 0.00  |
| -8 | 0.00 | 0.00 | 0.00  |
| -9 | 0.00 | 0.00 | 0.00  |
| -0 | 0.00 | 0.00 | 0.00  |
| -1 | 0.00 | 0.00 | 0.00  |
| -2 | 0.00 | 0.00 | 0.00  |
| -3 | 0.00 | 0.00 | 0.00  |
| -4 | 0.00 | 0.00 | 0.00  |
| -5 | 0.00 | 0.00 | -0.01 |
| -6 | 0.00 | 0.00 | 0.00  |
| -7 | 0.00 | 0.00 | -0.01 |

---

Frequencies -- -862.4506

Red. masses -- 1.0457

Frc consts -- 0.4583

IR Inten -- 217.1051

Zero-point correction= 0.303627

(Hartree/Particle)

Thermal correction to Energy= 0.325549

Thermal correction to Enthalpy= 0.326493

Thermal correction to Gibbs Free Energy= 0.251849

Sum of electronic and zero-point Energies= -515.357032

Sum of electronic and thermal Energies= -515.335109

Sum of electronic and thermal Enthalpies= -515.334165

Sum of electronic and thermal Free Energies= -515.408810

---

## TS-C-H<sub>2</sub>O

---

| Atomic<br>Number | Coordinates (Angstroms) |           |           |
|------------------|-------------------------|-----------|-----------|
|                  | X                       | Y         | Z         |
| 6                | -0.230554               | -0.032877 | -0.164546 |
| 1                | 0.066263                | 0.055860  | 1.172828  |
| 8                | 1.071235                | 0.049389  | 1.737889  |
| 1                | 1.491301                | 0.939603  | 1.696103  |
| 6                | -0.035588               | 1.111561  | -1.187246 |
| 6                | -0.082511               | -1.300571 | -0.931641 |
| 14               | -0.209933               | -0.149076 | -2.610312 |
| 6                | -1.479373               | 1.575119  | -1.645695 |
| 6                | -1.787970               | 0.902107  | -2.800821 |
| 6                | -2.331290               | 2.487682  | -0.806184 |
| 1                | -2.444627               | 2.052701  | 0.197417  |
| 1                | -1.854606               | 3.470321  | -0.679463 |
| 1                | -3.328554               | 2.643840  | -1.233424 |
| 6                | -3.032795               | 0.902038  | -3.639710 |
| 1                | -3.475667               | -0.102822 | -3.692153 |
| 1                | -3.793448               | 1.584652  | -3.237883 |
| 1                | -2.818465               | 1.212092  | -4.671810 |
| 6                | 1.243363                | -1.689413 | -1.657091 |
| 6                | 1.287360                | -1.229642 | -2.953719 |
| 6                | 2.289604                | -2.447597 | -0.877416 |
| 1                | 3.198179                | -2.628322 | -1.463692 |
| 1                | 2.547039                | -1.885414 | 0.031431  |
| 1                | 1.898109                | -3.420878 | -0.547715 |
| 6                | 2.383572                | -1.326215 | -3.977784 |
| 1                | 2.797528                | -0.336911 | -4.221268 |
| 1                | 3.211174                | -1.955203 | -3.624396 |
| 1                | 2.012745                | -1.760019 | -4.916250 |
| 6                | -0.846743               | -2.505089 | -0.380269 |
| 1                | -0.948707               | -3.298257 | -1.134391 |
| 1                | -0.337279               | -2.932415 | 0.496953  |
| 1                | -1.851186               | -2.202916 | -0.061844 |
| 6                | 0.950486                | 2.236838  | -0.894550 |
| 1                | 0.959184                | 2.976757  | -1.706116 |
| 1                | 0.691925                | 2.767873  | 0.036092  |
| 1                | 1.970421                | 1.846721  | -0.783505 |

---



|    |       |       |       |
|----|-------|-------|-------|
| -1 | -0.11 | -0.09 | 0.09  |
| -2 | 0.52  | 0.78  | -0.27 |
| -3 | 0.02  | 0.06  | -0.01 |
| -4 | -0.05 | 0.05  | 0.04  |
| -5 | 0.01  | -0.04 | -0.03 |
| -6 | 0.04  | 0.01  | 0.00  |
| -7 | 0.00  | -0.01 | -0.02 |
| -8 | -0.01 | 0.00  | -0.01 |
| -9 | 0.00  | 0.00  | 0.01  |
| -0 | 0.00  | 0.00  | 0.00  |
| -1 | 0.02  | -0.01 | 0.00  |
| -2 | 0.00  | 0.00  | 0.00  |
| -3 | 0.00  | 0.00  | 0.00  |
| -4 | 0.00  | 0.00  | 0.00  |
| -5 | 0.00  | 0.00  | 0.00  |
| -6 | 0.00  | 0.00  | 0.00  |
| -7 | 0.00  | 0.00  | 0.00  |
| -8 | 0.00  | -0.01 | 0.01  |
| -9 | 0.00  | -0.01 | 0.01  |
| -0 | 0.00  | 0.00  | 0.00  |
| -1 | 0.00  | -0.01 | 0.00  |
| -2 | 0.01  | -0.01 | 0.00  |
| -3 | 0.00  | 0.00  | 0.00  |
| -4 | 0.00  | 0.00  | 0.00  |
| -5 | 0.00  | 0.00  | 0.00  |
| -6 | 0.00  | 0.00  | 0.00  |
| -7 | 0.00  | 0.00  | 0.00  |
| -8 | 0.01  | 0.00  | 0.00  |
| -9 | 0.01  | 0.00  | 0.01  |
| -0 | 0.01  | 0.00  | 0.02  |
| -1 | 0.00  | 0.01  | -0.03 |
| -2 | 0.01  | 0.00  | 0.00  |
| -3 | 0.00  | 0.02  | -0.01 |
| -4 | 0.00  | 0.00  | 0.02  |
| -5 | 0.00  | 0.00  | -0.02 |

---

Frequencies -- -689.4050

Red. masses -- 1.4539

Frc consts -- 0.4071

IR Inten -- 278.7943

|                                              |             |
|----------------------------------------------|-------------|
| Zero-point correction=                       | 0.289593    |
| (Hartree/Particle)                           |             |
| Thermal correction to Energy=                | 0.307960    |
| Thermal correction to Enthalpy=              | 0.308904    |
| Thermal correction to Gibbs Free Energy=     | 0.245414    |
| Sum of electronic and zero-point Energies=   | -585.927326 |
| Sum of electronic and thermal Energies=      | -585.908959 |
| Sum of electronic and thermal Enthalpies=    | -585.908015 |
| Sum of electronic and thermal Free Energies= | -585.971506 |

---

## TS-Si-H<sub>2</sub>O

---

| Atomic<br>Number | Coordinates (Angstroms) |           |           |
|------------------|-------------------------|-----------|-----------|
|                  | X                       | Y         | Z         |
| 14               | 1.322104                | -0.206455 | -0.382778 |
| 1                | 2.895481                | 0.320989  | -0.002198 |
| 6                | 0.015481                | -1.261781 | 0.643581  |
| 6                | -0.154118               | 0.900925  | -1.077682 |
| 14               | -1.424649               | -0.154090 | -0.047140 |
| 6                | -0.728508               | -2.394035 | -0.109969 |
| 6                | -1.928613               | -1.898552 | -0.578999 |
| 6                | -0.146897               | -3.775508 | -0.280288 |
| 1                | -0.801816               | -4.440744 | -0.854576 |
| 1                | 0.827816                | -3.722309 | -0.788048 |
| 1                | 0.033853                | -4.239426 | 0.700480  |
| 6                | -2.997198               | -2.560123 | -1.404934 |
| 1                | -3.131095               | -2.048995 | -2.370034 |
| 1                | -2.762095               | -3.612740 | -1.614595 |
| 1                | -3.969803               | -2.532303 | -0.893016 |
| 6                | 0.370253                | -1.575229 | 2.103022  |
| 1                | -0.526553               | -1.854756 | 2.677785  |
| 1                | 1.085340                | -2.409514 | 2.176427  |
| 1                | 0.834160                | -0.710832 | 2.592791  |
| 6                | -0.672184               | 2.065680  | -0.196703 |
| 6                | -1.734723               | 1.611533  | 0.558555  |
| 6                | -0.059467               | 3.446164  | -0.214796 |
| 1                | -0.547733               | 4.131160  | 0.488123  |
| 1                | 1.013797                | 3.409803  | 0.028570  |

|    |           |          |           |
|----|-----------|----------|-----------|
| 1  | -0.130970 | 3.884103 | -1.220895 |
| 6  | -2.564225 | 2.313168 | 1.598585  |
| 1  | -2.477652 | 1.819351 | 2.577419  |
| 1  | -2.267935 | 3.363273 | 1.726990  |
| 1  | -3.630056 | 2.299630 | 1.330112  |
| 6  | -0.163277 | 1.182970 | -2.588257 |
| 1  | -1.145528 | 1.553693 | -2.919959 |
| 1  | 0.588194  | 1.937641 | -2.869500 |
| 1  | 0.060795  | 0.277730 | -3.169206 |
| 8  | 2.302072  | 0.794742 | 1.026352  |
| 1  | 2.238743  | 1.762464 | 1.214228  |
| -1 | 0.03      | 0.02     | -0.02     |
| -2 | -0.61     | -0.18    | 0.76      |
| -3 | -0.01     | 0.01     | 0.01      |
| -4 | -0.01     | 0.00     | 0.01      |
| -5 | 0.00      | 0.00     | 0.00      |
| -6 | 0.00      | 0.00     | 0.00      |
| -7 | 0.00      | 0.00     | 0.00      |
| -8 | 0.00      | 0.00     | 0.00      |
| -9 | 0.00      | 0.00     | 0.00      |
| -0 | 0.00      | 0.00     | 0.00      |
| -1 | 0.00      | 0.00     | 0.00      |
| -2 | 0.00      | 0.00     | 0.00      |
| -3 | 0.00      | 0.00     | 0.00      |
| -4 | 0.00      | 0.00     | 0.00      |
| -5 | 0.00      | 0.00     | 0.00      |
| -6 | 0.00      | 0.00     | 0.00      |
| -7 | 0.00      | -0.01    | 0.01      |
| -8 | 0.00      | 0.00     | 0.00      |
| -9 | 0.00      | 0.00     | 0.01      |
| -0 | 0.00      | 0.00     | 0.00      |
| -1 | 0.00      | 0.00     | 0.00      |
| -2 | 0.00      | 0.00     | 0.00      |
| -3 | 0.00      | 0.00     | 0.00      |
| -4 | -0.01     | 0.00     | 0.00      |
| -5 | 0.00      | 0.00     | 0.00      |
| -6 | 0.00      | 0.00     | 0.00      |
| -7 | 0.00      | 0.00     | 0.00      |
| -8 | 0.00      | 0.00     | 0.00      |
| -9 | 0.00      | 0.00     | 0.00      |

|    |       |       |       |
|----|-------|-------|-------|
| -0 | 0.00  | 0.00  | 0.00  |
| -1 | 0.00  | 0.00  | 0.00  |
| -2 | 0.00  | 0.00  | 0.00  |
| -3 | 0.00  | -0.01 | 0.00  |
| -4 | 0.00  | -0.02 | -0.03 |
| -5 | -0.01 | -0.08 | -0.03 |

-----  
Frequencies -- -1408.6516

Red. masses -- 1.0714

Frc consts -- 1.2526

IR Inten -- 1577.6011

Zero-point correction= 0.285427

(Hartree/Particle)

Thermal correction to Energy= 0.305127

Thermal correction to Enthalpy= 0.306071

Thermal correction to Gibbs Free Energy= 0.239383

Sum of electronic and zero-point Energies= -551.783014

Sum of electronic and thermal Energies= -551.763315

Sum of electronic and thermal Enthalpies= -551.762370

Sum of electronic and thermal Free Energies= -551.829059

-----

## TS-Ge-H<sub>2</sub>O

| Atomic<br>Number | Coordinates (Angstroms) |           |           |
|------------------|-------------------------|-----------|-----------|
|                  | X                       | Y         | Z         |
| 32               | 1.413116                | -0.183422 | -0.374646 |
| 1                | 2.976637                | 0.377613  | 0.060879  |
| 6                | 0.021582                | -1.299114 | 0.649153  |
| 6                | -0.166236               | 0.918402  | -1.104873 |
| 14               | -1.390393               | -0.156915 | -0.049611 |
| 6                | -0.730813               | -2.412309 | -0.111852 |
| 6                | -1.919205               | -1.892952 | -0.587222 |
| 6                | -0.177677               | -3.805835 | -0.279627 |
| 1                | -0.845873               | -4.457889 | -0.853727 |
| 1                | 0.798255                | -3.775472 | -0.786751 |
| 1                | -0.007115               | -4.272004 | 0.701578  |
| 6                | -2.995316               | -2.534537 | -1.419310 |
| 1                | -3.121718               | -2.015605 | -2.381121 |

|    |           |           |           |
|----|-----------|-----------|-----------|
| 1  | -2.774949 | -3.589015 | -1.635461 |
| 1  | -3.967961 | -2.496683 | -0.908321 |
| 6  | 0.380404  | -1.609066 | 2.107347  |
| 1  | -0.519533 | -1.851304 | 2.694672  |
| 1  | 1.065631  | -2.467867 | 2.182804  |
| 1  | 0.878863  | -0.755266 | 2.581732  |
| 6  | -0.676277 | 2.080442  | -0.222515 |
| 6  | -1.710237 | 1.607783  | 0.561980  |
| 6  | -0.086128 | 3.469911  | -0.260712 |
| 1  | -0.563501 | 4.148441  | 0.455941  |
| 1  | 0.994306  | 3.446642  | -0.048720 |
| 1  | -0.193686 | 3.905974  | -1.264961 |
| 6  | -2.528368 | 2.299076  | 1.617645  |
| 1  | -2.417981 | 1.806439  | 2.594691  |
| 1  | -2.242290 | 3.352673  | 1.740553  |
| 1  | -3.598949 | 2.273062  | 1.369064  |
| 6  | -0.191819 | 1.172242  | -2.619246 |
| 1  | -1.180019 | 1.530575  | -2.948179 |
| 1  | 0.550261  | 1.927376  | -2.922958 |
| 1  | 0.029788  | 0.257678  | -3.187333 |
| 8  | 2.305186  | 0.857059  | 1.157803  |
| 1  | 2.215004  | 1.821489  | 1.350753  |
| -1 | -0.01     | 0.00      | -0.01     |
| -2 | 0.57      | 0.03      | 0.81      |
| -3 | 0.01      | 0.01      | 0.00      |
| -4 | 0.01      | 0.00      | 0.01      |
| -5 | 0.00      | 0.00      | 0.00      |
| -6 | 0.00      | 0.00      | 0.00      |
| -7 | 0.00      | 0.00      | 0.00      |
| -8 | 0.00      | 0.00      | 0.00      |
| -9 | 0.00      | 0.00      | 0.00      |
| -0 | 0.00      | 0.00      | 0.00      |
| -1 | 0.00      | 0.00      | 0.00      |
| -2 | 0.00      | 0.00      | 0.00      |
| -3 | 0.00      | 0.00      | 0.00      |
| -4 | 0.00      | 0.00      | 0.00      |
| -5 | 0.00      | 0.00      | 0.00      |
| -6 | 0.00      | 0.00      | 0.00      |
| -7 | 0.00      | -0.01     | 0.01      |
| -8 | 0.00      | 0.00      | 0.00      |

|    |      |       |       |
|----|------|-------|-------|
| -9 | 0.00 | 0.00  | 0.01  |
| -0 | 0.00 | 0.00  | 0.00  |
| -1 | 0.00 | 0.00  | 0.00  |
| -2 | 0.00 | 0.00  | 0.00  |
| -3 | 0.00 | 0.00  | 0.00  |
| -4 | 0.01 | 0.00  | 0.00  |
| -5 | 0.00 | 0.00  | 0.00  |
| -6 | 0.00 | 0.00  | 0.00  |
| -7 | 0.00 | 0.00  | 0.00  |
| -8 | 0.00 | 0.00  | 0.00  |
| -9 | 0.00 | 0.00  | 0.00  |
| -0 | 0.00 | 0.00  | 0.00  |
| -1 | 0.00 | 0.00  | 0.00  |
| -2 | 0.00 | 0.00  | 0.00  |
| -3 | 0.00 | 0.00  | 0.00  |
| -4 | 0.00 | -0.03 | -0.02 |
| -5 | 0.02 | -0.09 | -0.03 |

---

Frequencies -- -1365.2862

Red. masses -- 1.0466

Frc consts -- 1.1494

IR Inten -- 1510.4289

Zero-point correction= 0.283903

(Hartree/Particle)

Thermal correction to Energy= 0.304120

Thermal correction to Enthalpy= 0.305065

Thermal correction to Gibbs Free Energy= 0.236723

Sum of electronic and zero-point Energies= -551.681325

Sum of electronic and thermal Energies= -551.661107

Sum of electronic and thermal Enthalpies= -551.660163

Sum of electronic and thermal Free Energies= -551.728504

---

## TS-Sn-H<sub>2</sub>O

---

| Atomic<br>Number | Coordinates (Angstroms) |           |           |
|------------------|-------------------------|-----------|-----------|
|                  | X                       | Y         | Z         |
| 50               | 1.561005                | -0.185658 | -0.495230 |
| 1                | 3.407379                | 0.114668  | -0.313862 |

---

|    |           |           |           |
|----|-----------|-----------|-----------|
| 6  | -0.010343 | -1.283947 | 0.649415  |
| 6  | -0.208116 | 1.012572  | -1.156908 |
| 14 | -1.382829 | -0.146649 | -0.126447 |
| 6  | -0.763199 | -2.422673 | -0.062469 |
| 6  | -1.907509 | -1.896248 | -0.632283 |
| 6  | -0.254983 | -3.842551 | -0.105575 |
| 1  | -0.916740 | -4.511623 | -0.667716 |
| 1  | 0.746559  | -3.880519 | -0.560243 |
| 1  | -0.152003 | -4.243427 | 0.913250  |
| 6  | -2.950865 | -2.553987 | -1.493866 |
| 1  | -3.013670 | -2.075357 | -2.482442 |
| 1  | -2.740398 | -3.620525 | -1.653569 |
| 1  | -3.949869 | -2.477221 | -1.041237 |
| 6  | 0.299913  | -1.496793 | 2.138649  |
| 1  | -0.614403 | -1.741691 | 2.705191  |
| 1  | 1.015441  | -2.318712 | 2.297451  |
| 1  | 0.739254  | -0.599159 | 2.596115  |
| 6  | -0.752851 | 2.118301  | -0.225851 |
| 6  | -1.779175 | 1.583508  | 0.529588  |
| 6  | -0.197842 | 3.521249  | -0.194381 |
| 1  | -0.738984 | 4.169743  | 0.504905  |
| 1  | 0.863703  | 3.509715  | 0.095274  |
| 1  | -0.247947 | 3.979855  | -1.192334 |
| 6  | -2.634655 | 2.212303  | 1.595527  |
| 1  | -2.518015 | 1.697623  | 2.560661  |
| 1  | -2.392289 | 3.272614  | 1.750713  |
| 1  | -3.700656 | 2.151346  | 1.332122  |
| 6  | -0.293018 | 1.330111  | -2.659167 |
| 1  | -1.307885 | 1.653098  | -2.944029 |
| 1  | 0.399200  | 2.136308  | -2.947641 |
| 1  | -0.043283 | 0.456454  | -3.278107 |
| 8  | 2.896274  | 0.697224  | 0.872489  |
| 1  | 3.165788  | 1.357675  | 1.551460  |
| -1 | -0.01     | 0.00      | -0.01     |
| -2 | 0.54      | -0.01     | 0.82      |
| -3 | 0.01      | 0.00      | 0.00      |
| -4 | 0.01      | 0.00      | 0.01      |
| -5 | 0.00      | 0.00      | 0.00      |
| -6 | 0.00      | 0.00      | 0.00      |
| -7 | 0.00      | 0.00      | 0.00      |

|    |      |       |       |
|----|------|-------|-------|
| -8 | 0.00 | 0.00  | 0.00  |
| -9 | 0.00 | 0.00  | 0.00  |
| -0 | 0.00 | 0.00  | 0.00  |
| -1 | 0.00 | 0.00  | 0.00  |
| -2 | 0.00 | 0.00  | 0.00  |
| -3 | 0.00 | 0.00  | 0.00  |
| -4 | 0.00 | 0.00  | 0.00  |
| -5 | 0.00 | 0.00  | 0.00  |
| -6 | 0.00 | 0.00  | 0.00  |
| -7 | 0.00 | 0.00  | 0.01  |
| -8 | 0.00 | 0.00  | 0.00  |
| -9 | 0.00 | 0.00  | 0.01  |
| -0 | 0.00 | 0.00  | 0.00  |
| -1 | 0.00 | 0.00  | 0.00  |
| -2 | 0.00 | 0.00  | 0.00  |
| -3 | 0.00 | 0.00  | 0.00  |
| -4 | 0.00 | 0.00  | 0.00  |
| -5 | 0.00 | 0.00  | 0.00  |
| -6 | 0.00 | 0.00  | 0.00  |
| -7 | 0.00 | 0.00  | 0.00  |
| -8 | 0.00 | 0.00  | 0.00  |
| -9 | 0.00 | 0.00  | 0.00  |
| -0 | 0.00 | 0.00  | 0.00  |
| -1 | 0.00 | 0.00  | 0.00  |
| -2 | 0.00 | 0.00  | 0.00  |
| -3 | 0.00 | 0.00  | 0.00  |
| -4 | 0.00 | -0.03 | -0.02 |
| -5 | 0.03 | -0.16 | -0.06 |

-----  
Frequencies -- -1336.1451

Red. masses -- 1.0348

Frc consts -- 1.0884

IR Inten -- 2090.0015

Zero-point correction= 0.282018

(Hartree/Particle)

Thermal correction to Energy= 0.302837

Thermal correction to Enthalpy= 0.303781

Thermal correction to Gibbs Free Energy= 0.233622

Sum of electronic and zero-point Energies= -551.293299

Sum of electronic and thermal Energies= -551.272480



Sum of electronic and thermal Enthalpies= -551.271536  
Sum of electronic and thermal Free Energies= -551.341696

---

## TS-Pb-H<sub>2</sub>O

---

| Atomic<br>Number | Coordinates (Angstroms) |           |           |
|------------------|-------------------------|-----------|-----------|
|                  | X                       | Y         | Z         |
| 82               | 1.688192                | -0.141205 | -0.415919 |
| 1                | 3.342155                | 0.526592  | 0.124404  |
| 6                | 0.030154                | -1.389000 | 0.637283  |
| 6                | -0.193365               | 0.983589  | -1.189080 |
| 14               | -1.293960               | -0.163687 | -0.088755 |
| 6                | -0.759170               | -2.468213 | -0.105976 |
| 6                | -1.901549               | -1.879684 | -0.618664 |
| 6                | -0.305395               | -3.902296 | -0.223390 |
| 1                | -1.018134               | -4.523682 | -0.777449 |
| 1                | 0.669605                | -3.959070 | -0.730163 |
| 1                | -0.168686               | -4.346716 | 0.772746  |
| 6                | -3.006200               | -2.469485 | -1.451204 |
| 1                | -3.091842               | -1.959637 | -2.422529 |
| 1                | -2.849932               | -3.539042 | -1.648165 |
| 1                | -3.980335               | -2.363124 | -0.952429 |
| 6                | 0.412695                | -1.658846 | 2.094824  |
| 1                | -0.485434               | -1.791906 | 2.722011  |
| 1                | 1.017908                | -2.572888 | 2.194064  |
| 1                | 0.995176                | -0.828895 | 2.516191  |
| 6                | -0.696357               | 2.116989  | -0.283784 |
| 6                | -1.644920               | 1.583014  | 0.569842  |
| 6                | -0.183224               | 3.534381  | -0.354044 |
| 1                | -0.656179               | 4.189490  | 0.386770  |
| 1                | 0.905690                | 3.560572  | -0.195130 |
| 1                | -0.364596               | 3.961971  | -1.351004 |
| 6                | -2.425358               | 2.227092  | 1.682023  |
| 1                | -2.234759               | 1.729380  | 2.644242  |
| 1                | -2.176517               | 3.290636  | 1.800859  |
| 1                | -3.507650               | 2.158376  | 1.499799  |
| 6                | -0.277909               | 1.207340  | -2.703974 |
| 1                | -1.293120               | 1.513525  | -3.008591 |

|    |           |          |           |
|----|-----------|----------|-----------|
| 1  | 0.413196  | 1.992625 | -3.047064 |
| 1  | -0.033975 | 0.293729 | -3.264657 |
| 8  | 2.414938  | 0.919764 | 1.367662  |
| 1  | 2.281847  | 1.845935 | 1.678702  |
| -1 | 0.00      | 0.00     | 0.00      |
| -2 | 0.33      | 0.41     | 0.84      |
| -3 | 0.01      | 0.00     | 0.00      |
| -4 | 0.00      | 0.00     | 0.01      |
| -5 | 0.00      | 0.00     | 0.00      |
| -6 | 0.00      | 0.00     | 0.00      |
| -7 | 0.00      | 0.00     | 0.00      |
| -8 | 0.00      | 0.00     | 0.00      |
| -9 | 0.00      | 0.00     | 0.00      |
| -0 | 0.00      | 0.00     | 0.00      |
| -1 | 0.00      | 0.00     | 0.00      |
| -2 | 0.00      | 0.00     | 0.00      |
| -3 | 0.00      | 0.00     | 0.00      |
| -4 | 0.00      | 0.00     | 0.00      |
| -5 | 0.00      | 0.00     | 0.00      |
| -6 | 0.00      | 0.00     | 0.00      |
| -7 | 0.00      | 0.00     | 0.01      |
| -8 | 0.00      | 0.00     | 0.00      |
| -9 | -0.01     | 0.00     | 0.02      |
| -0 | 0.00      | 0.00     | 0.00      |
| -1 | 0.00      | 0.00     | 0.00      |
| -2 | 0.00      | 0.00     | 0.00      |
| -3 | 0.00      | 0.00     | 0.00      |
| -4 | 0.00      | 0.00     | 0.00      |
| -5 | 0.00      | 0.00     | 0.00      |
| -6 | 0.00      | 0.00     | 0.00      |
| -7 | 0.00      | 0.00     | 0.00      |
| -8 | 0.00      | 0.00     | 0.00      |
| -9 | 0.00      | 0.00     | 0.00      |
| -0 | 0.00      | 0.00     | 0.00      |
| -1 | 0.00      | 0.00     | 0.00      |
| -2 | 0.00      | 0.00     | 0.00      |
| -3 | 0.00      | 0.00     | 0.00      |
| -4 | 0.02      | -0.03    | -0.01     |
| -5 | 0.08      | -0.09    | -0.02     |

Frequencies -- -1136.8226

Red. masses -- 1.0378

Frc consts -- 0.7902

IR Inten -- 1352.8914

Zero-point correction= 0.281745

(Hartree/Particle)

Thermal correction to Energy= 0.302622

Thermal correction to Enthalpy= 0.303566

Thermal correction to Gibbs Free Energy= 0.232772

Sum of electronic and zero-point Energies= -551.371483

Sum of electronic and thermal Energies= -551.350606

Sum of electronic and thermal Enthalpies= -551.349661

Sum of electronic and thermal Free Energies= -551.420455

---

### Pro-C-C<sub>2</sub>H<sub>4</sub>

---

| Atomic<br>Number | Coordinates (Angstroms) |           |           |
|------------------|-------------------------|-----------|-----------|
|                  | X                       | Y         | Z         |
| 6                | -2.201250               | 0.138110  | -0.073439 |
| 6                | -0.887307               | 0.796986  | -0.598758 |
| 6                | 0.839572                | 0.117648  | 0.982094  |
| 6                | 2.061977                | -0.290530 | 0.101931  |
| 6                | -1.996687               | -1.221803 | 0.025293  |
| 6                | 1.655695                | -1.271332 | -0.777801 |
| 6                | 3.425371                | 0.348999  | 0.217555  |
| 1                | 4.168255                | -0.133926 | -0.427943 |
| 1                | 3.380696                | 1.412592  | -0.054820 |
| 1                | 3.790104                | 0.298233  | 1.253572  |
| 6                | 2.420093                | -2.000155 | -1.847832 |
| 1                | 1.998514                | -1.803419 | -2.844214 |
| 1                | 3.478974                | -1.708787 | -1.870197 |
| 1                | 2.376917                | -3.087595 | -1.693431 |
| 6                | 1.044883                | -0.075686 | 2.482384  |
| 1                | 1.473652                | -1.063651 | 2.698360  |
| 1                | 1.728152                | 0.677901  | 2.910862  |
| 1                | 0.093295                | 0.004097  | 3.023596  |
| 6                | -1.046582               | 1.575266  | -1.902412 |
| 1                | -1.606610               | 0.990627  | -2.644790 |
| 1                | -1.589999               | 2.524837  | -1.756980 |

|    |           |           |           |
|----|-----------|-----------|-----------|
| 1  | -0.069426 | 1.823202  | -2.336368 |
| 6  | -3.441108 | 0.921342  | 0.288171  |
| 1  | -4.280213 | 0.270809  | 0.561137  |
| 1  | -3.243646 | 1.592711  | 1.135245  |
| 1  | -3.759272 | 1.552595  | -0.553990 |
| 6  | -2.916977 | -2.315013 | 0.493083  |
| 1  | -2.520351 | -2.813911 | 1.389011  |
| 1  | -3.917938 | -1.935394 | 0.738500  |
| 1  | -3.034528 | -3.090409 | -0.276782 |
| 6  | 0.057420  | 1.398460  | 0.506479  |
| 14 | -0.146058 | -0.959402 | -0.282803 |
| 6  | 0.694211  | 2.788605  | 0.390196  |
| 1  | 0.413901  | 3.420607  | -0.448514 |
| 1  | 1.724677  | 2.913990  | 0.711978  |
| 6  | -0.359195 | 2.518425  | 1.467852  |
| 1  | -0.027878 | 2.463698  | 2.501515  |
| 1  | -1.338291 | 2.972787  | 1.341082  |

---

|                                              |             |
|----------------------------------------------|-------------|
| Zero-point correction=                       | 0.328714    |
| (Hartree/Particle)                           |             |
| Thermal correction to Energy=                | 0.347468    |
| Thermal correction to Enthalpy=              | 0.348412    |
| Thermal correction to Gibbs Free Energy=     | 0.284111    |
| Sum of electronic and zero-point Energies=   | -588.160681 |
| Sum of electronic and thermal Energies=      | -588.141927 |
| Sum of electronic and thermal Enthalpies=    | -588.140982 |
| Sum of electronic and thermal Free Energies= | -588.205284 |

---

### Pro-Si-C<sub>2</sub>H<sub>4</sub>

---

| Atomic<br>Number | Coordinates (Angstroms) |           |           |
|------------------|-------------------------|-----------|-----------|
|                  | X                       | Y         | Z         |
| 14               | -0.002144               | 1.231289  | -0.001149 |
| 6                | 2.227390                | 0.479457  | -0.057024 |
| 6                | 1.072355                | -0.143355 | -0.886106 |
| 6                | -1.082060               | -0.145859 | 0.873100  |
| 6                | -2.234678               | 0.487995  | 0.049028  |
| 6                | 1.763835                | 1.628333  | 0.549442  |

|    |           |           |           |
|----|-----------|-----------|-----------|
| 6  | -1.766553 | 1.639711  | -0.548487 |
| 6  | -3.601485 | -0.141456 | -0.055724 |
| 1  | -4.289574 | 0.444410  | -0.676062 |
| 1  | -3.523564 | -1.151651 | -0.484474 |
| 1  | -4.052412 | -0.253206 | 0.941168  |
| 6  | -2.458979 | 2.604689  | -1.470991 |
| 1  | -1.958575 | 2.652619  | -2.449477 |
| 1  | -3.507471 | 2.326022  | -1.644982 |
| 1  | -2.449901 | 3.624181  | -1.058810 |
| 6  | -1.366834 | -0.287546 | 2.375280  |
| 1  | -1.745669 | 0.654405  | 2.800698  |
| 1  | -2.119515 | -1.065765 | 2.578479  |
| 1  | -0.459789 | -0.564627 | 2.928497  |
| 6  | 1.356911  | -0.274400 | -2.389299 |
| 1  | 1.738875  | 0.669566  | -2.807372 |
| 1  | 2.107156  | -1.053429 | -2.598286 |
| 1  | 0.449121  | -0.544352 | -2.944802 |
| 6  | 3.591712  | -0.156215 | 0.042913  |
| 1  | 4.282292  | 0.422525  | 0.667161  |
| 1  | 3.509929  | -1.169105 | 0.464606  |
| 1  | 4.041936  | -0.262740 | -0.954886 |
| 6  | 2.460026  | 2.583158  | 1.479641  |
| 1  | 1.960186  | 2.624672  | 2.458706  |
| 1  | 3.507586  | 2.299341  | 1.650883  |
| 1  | 2.454391  | 3.606075  | 1.076001  |
| 14 | -0.007697 | -1.487958 | -0.011927 |
| 6  | 0.438286  | -3.207413 | 0.626972  |
| 1  | 1.450768  | -3.592815 | 0.510961  |
| 1  | -0.035674 | -3.570948 | 1.539054  |
| 6  | -0.462224 | -3.199637 | -0.665402 |
| 1  | 0.009912  | -3.557898 | -1.580514 |
| 1  | -1.476674 | -3.580832 | -0.552680 |

---

|                                            |             |
|--------------------------------------------|-------------|
| Zero-point correction=                     | 0.322046    |
| (Hartree/Particle)                         |             |
| Thermal correction to Energy=              | 0.342227    |
| Thermal correction to Enthalpy=            | 0.343171    |
| Thermal correction to Gibbs Free Energy=   | 0.275187    |
| Sum of electronic and zero-point Energies= | -553.973773 |
| Sum of electronic and thermal Energies=    | -553.953591 |

Sum of electronic and thermal Enthalpies= -553.952647  
Sum of electronic and thermal Free Energies= -554.020632

---

## Pro-Ge-C<sub>2</sub>H<sub>4</sub>

---

| Atomic<br>Number | Coordinates (Angstroms) |           |           |
|------------------|-------------------------|-----------|-----------|
|                  | X                       | Y         | Z         |
| 14               | -0.002040               | 1.225115  | -0.000765 |
| 6                | 2.241776                | 0.505917  | -0.065833 |
| 6                | 1.094957                | -0.115827 | -0.902673 |
| 6                | -1.104415               | -0.118326 | 0.890662  |
| 6                | -2.248576               | 0.514110  | 0.058176  |
| 6                | 1.758724                | 1.637712  | 0.558237  |
| 6                | -1.761049               | 1.648903  | -0.556910 |
| 6                | -3.628642               | -0.088592 | -0.029877 |
| 1                | -4.304954               | 0.496983  | -0.663378 |
| 1                | -3.574176               | -1.110725 | -0.433835 |
| 1                | -4.080501               | -0.165624 | 0.969942  |
| 6                | -2.437785               | 2.611788  | -1.493242 |
| 1                | -1.945824               | 2.625405  | -2.477028 |
| 1                | -3.494975               | 2.357604  | -1.651638 |
| 1                | -2.397737               | 3.639419  | -1.103739 |
| 6                | -1.384225               | -0.245269 | 2.394622  |
| 1                | -1.747275               | 0.706659  | 2.813250  |
| 1                | -2.148725               | -1.009051 | 2.607390  |
| 1                | -0.479572               | -0.530809 | 2.947127  |
| 6                | 1.373818                | -0.232388 | -2.407656 |
| 1                | 1.740402                | 0.721314  | -2.819094 |
| 1                | 2.135304                | -0.997463 | -2.626491 |
| 1                | 0.467888                | -0.510237 | -2.961985 |
| 6                | 3.619713                | -0.102405 | 0.016911  |
| 1                | 4.298436                | 0.475949  | 0.654451  |
| 1                | 3.561912                | -1.127374 | 0.413140  |
| 1                | 4.070764                | -0.173464 | -0.983722 |
| 6                | 2.439378                | 2.590603  | 1.501939  |
| 1                | 1.947968                | 2.598005  | 2.486061  |
| 1                | 3.495712                | 2.331353  | 1.657750  |
| 1                | 2.402831                | 3.621482  | 1.120809  |

|    |           |           |           |
|----|-----------|-----------|-----------|
| 32 | -0.007624 | -1.554834 | -0.011610 |
| 6  | 0.435016  | -3.367573 | 0.626170  |
| 1  | 1.449352  | -3.750616 | 0.514600  |
| 1  | -0.040550 | -3.729143 | 1.538639  |
| 6  | -0.460406 | -3.359035 | -0.666198 |
| 1  | 0.013182  | -3.714954 | -1.581917 |
| 1  | -1.476887 | -3.737372 | -0.558148 |

---

|                                              |             |
|----------------------------------------------|-------------|
| Zero-point correction=                       | 0.320282    |
| (Hartree/Particle)                           |             |
| Thermal correction to Energy=                | 0.341028    |
| Thermal correction to Enthalpy=              | 0.341972    |
| Thermal correction to Gibbs Free Energy=     | 0.272277    |
| Sum of electronic and zero-point Energies=   | -553.851736 |
| Sum of electronic and thermal Energies=      | -553.830991 |
| Sum of electronic and thermal Enthalpies=    | -553.830047 |
| Sum of electronic and thermal Free Energies= | -553.899742 |

---

### Pro-Sn-C<sub>2</sub>H<sub>4</sub>

---

| Atomic<br>Number | Coordinates (Angstroms) |           |           |
|------------------|-------------------------|-----------|-----------|
|                  | X                       | Y         | Z         |
| 14               | -0.002022               | 1.205495  | -0.000898 |
| 6                | 2.269686                | 0.563080  | -0.084755 |
| 6                | 1.141770                | -0.074049 | -0.930141 |
| 6                | -1.150810               | -0.076527 | 0.918594  |
| 6                | -2.276140               | 0.571125  | 0.077718  |
| 6                | 1.745012                | 1.657183  | 0.573292  |
| 6                | -1.747210               | 1.668230  | -0.571867 |
| 6                | -3.680324               | 0.025128  | 0.019137  |
| 1                | -4.339518               | 0.624871  | -0.618922 |
| 1                | -3.673210               | -1.006122 | -0.363716 |
| 1                | -4.122190               | -0.013221 | 1.025119  |
| 6                | -2.392671               | 2.632275  | -1.528972 |
| 1                | -1.901686               | 2.608089  | -2.512870 |
| 1                | -3.457638               | 2.410892  | -1.681853 |
| 1                | -2.317578               | 3.666060  | -1.162853 |
| 6                | -1.419611               | -0.140405 | 2.430627  |

|    |           |           |           |
|----|-----------|-----------|-----------|
| 1  | -1.747520 | 0.839032  | 2.815804  |
| 1  | -2.207048 | -0.867988 | 2.679265  |
| 1  | -0.520481 | -0.433355 | 2.988595  |
| 6  | 1.410029  | -0.127635 | -2.442677 |
| 1  | 1.740994  | 0.853583  | -2.820642 |
| 1  | 2.195121  | -0.855846 | -2.696835 |
| 1  | 0.509852  | -0.413645 | -3.002562 |
| 6  | 3.671876  | 0.011460  | -0.030635 |
| 1  | 4.333320  | 0.603733  | 0.612062  |
| 1  | 3.661089  | -1.022750 | 0.344074  |
| 1  | 4.113500  | -0.020567 | -1.036949 |
| 6  | 2.394293  | 2.611361  | 1.537681  |
| 1  | 1.903495  | 2.581285  | 2.521511  |
| 1  | 3.458477  | 2.384864  | 1.688523  |
| 1  | 2.322919  | 3.648244  | 1.179684  |
| 50 | -0.007728 | -1.719683 | -0.012041 |
| 6  | 0.432940  | -3.723204 | 0.622581  |
| 1  | 1.446155  | -4.110463 | 0.505574  |
| 1  | -0.040394 | -4.098617 | 1.531422  |
| 6  | -0.460399 | -3.714228 | -0.666293 |
| 1  | 0.010741  | -4.083854 | -1.578654 |
| 1  | -1.475893 | -4.096589 | -0.552994 |

---

|                                              |             |
|----------------------------------------------|-------------|
| Zero-point correction=                       | 0.318731    |
| (Hartree/Particle)                           |             |
| Thermal correction to Energy=                | 0.340075    |
| Thermal correction to Enthalpy=              | 0.341020    |
| Thermal correction to Gibbs Free Energy=     | 0.269028    |
| Sum of electronic and zero-point Energies=   | -553.445568 |
| Sum of electronic and thermal Energies=      | -553.424224 |
| Sum of electronic and thermal Enthalpies=    | -553.423280 |
| Sum of electronic and thermal Free Energies= | -553.495272 |

---

### Pro-Pb-C<sub>2</sub>H<sub>4</sub>

---

| Atomic<br>Number | Coordinates (Angstroms) |          |           |
|------------------|-------------------------|----------|-----------|
|                  | X                       | Y        | Z         |
| 14               | -0.001028               | 1.209306 | -0.000423 |

---



|    |           |           |           |
|----|-----------|-----------|-----------|
| 6  | 2.285152  | 0.600277  | -0.092014 |
| 6  | 1.162762  | -0.026646 | -0.940458 |
| 6  | -1.167108 | -0.027585 | 0.935350  |
| 6  | -2.288465 | 0.604732  | 0.089402  |
| 6  | 1.743816  | 1.677861  | 0.581289  |
| 6  | -1.744967 | 1.683633  | -0.580141 |
| 6  | -3.697780 | 0.072003  | 0.041120  |
| 1  | -4.351355 | 0.669201  | -0.604917 |
| 1  | -3.700009 | -0.964000 | -0.328584 |
| 1  | -4.139480 | 0.051262  | 1.047668  |
| 6  | -2.380111 | 2.642698  | -1.548289 |
| 1  | -1.894490 | 2.594666  | -2.534197 |
| 1  | -3.449422 | 2.436925  | -1.692186 |
| 1  | -2.285455 | 3.681050  | -1.199668 |
| 6  | -1.425504 | -0.122615 | 2.443749  |
| 1  | -1.749549 | 0.850853  | 2.849005  |
| 1  | -2.214097 | -0.851543 | 2.683135  |
| 1  | -0.523501 | -0.427316 | 2.989525  |
| 6  | 1.421383  | -0.117004 | -2.449181 |
| 1  | 1.746461  | 0.857540  | -2.851179 |
| 1  | 2.209399  | -0.845912 | -2.690673 |
| 1  | 0.519222  | -0.419208 | -2.996134 |
| 6  | 3.693407  | 0.064532  | -0.045336 |
| 1  | 4.347904  | 0.657739  | 0.603434  |
| 1  | 3.693549  | -0.973026 | 0.319990  |
| 1  | 4.135502  | 0.047114  | -1.051741 |
| 6  | 2.380797  | 2.632044  | 1.553042  |
| 1  | 1.894620  | 2.581709  | 2.538504  |
| 1  | 3.449589  | 2.423334  | 1.696722  |
| 1  | 2.288699  | 3.671794  | 1.208018  |
| 82 | -0.004809 | -1.778566 | -0.006894 |
| 6  | 0.422774  | -3.863980 | 0.613557  |
| 1  | 1.440596  | -4.240344 | 0.498518  |
| 1  | -0.051392 | -4.233666 | 1.524495  |
| 6  | -0.464029 | -3.842827 | -0.673188 |
| 1  | 0.005080  | -4.201137 | -1.591349 |
| 1  | -1.486963 | -4.207655 | -0.565839 |

---

Zero-point correction= 0.317564  
(Hartree/Particle)

|                                              |             |
|----------------------------------------------|-------------|
| Thermal correction to Energy=                | 0.338453    |
| Thermal correction to Enthalpy=              | 0.339397    |
| Thermal correction to Gibbs Free Energy=     | 0.268577    |
| Sum of electronic and zero-point Energies=   | -553.506036 |
| Sum of electronic and thermal Energies=      | -553.485147 |
| Sum of electronic and thermal Enthalpies=    | -553.484203 |
| Sum of electronic and thermal Free Energies= | -553.555023 |

---

## Pro-C-CH<sub>4</sub>

---

| Atomic<br>Number | Coordinates (Angstroms) |           |           |
|------------------|-------------------------|-----------|-----------|
|                  | X                       | Y         | Z         |
| 6                | -2.187122               | 0.117437  | -0.080034 |
| 6                | -0.884055               | 0.779710  | -0.618514 |
| 6                | 0.847413                | 0.093814  | 0.962993  |
| 6                | 2.079915                | -0.323771 | 0.106270  |
| 6                | -1.981126               | -1.242575 | 0.013424  |
| 6                | 1.673416                | -1.284063 | -0.797463 |
| 6                | 3.466250                | 0.250510  | 0.288675  |
| 1                | 4.199150                | -0.206593 | -0.387005 |
| 1                | 3.472565                | 1.335386  | 0.118078  |
| 1                | 3.811387                | 0.090480  | 1.321006  |
| 6                | 2.447632                | -2.014910 | -1.859085 |
| 1                | 2.039633                | -1.813291 | -2.860164 |
| 1                | 3.508609                | -1.730186 | -1.867591 |
| 1                | 2.395815                | -3.102583 | -1.708401 |
| 6                | 1.030075                | -0.088229 | 2.468982  |
| 1                | 1.455056                | -1.072534 | 2.710602  |
| 1                | 1.702817                | 0.674521  | 2.896942  |
| 1                | 0.068262                | -0.001704 | 2.993485  |
| 6                | -1.076952               | 1.557394  | -1.920084 |
| 1                | -1.623537               | 0.953050  | -2.657160 |
| 1                | -1.651425               | 2.486312  | -1.766303 |
| 1                | -0.117818               | 1.840061  | -2.371208 |
| 6                | -3.406787               | 0.915641  | 0.314473  |
| 1                | -4.208805               | 0.288650  | 0.721481  |
| 1                | -3.146280               | 1.671021  | 1.070740  |
| 1                | -3.808182               | 1.461486  | -0.552005 |

|    |           |           |           |
|----|-----------|-----------|-----------|
| 6  | -2.894439 | -2.335616 | 0.494414  |
| 1  | -2.471634 | -2.854385 | 1.366040  |
| 1  | -3.882644 | -1.951633 | 0.780201  |
| 1  | -3.046574 | -3.095552 | -0.284152 |
| 6  | 0.898204  | 2.623576  | 0.098953  |
| 1  | 0.263558  | 3.475228  | -0.182016 |
| 1  | 1.545755  | 2.948499  | 0.925164  |
| 1  | 1.539539  | 2.391657  | -0.760695 |
| 6  | 0.048817  | 1.410839  | 0.522888  |
| 1  | -0.567822 | 1.714621  | 1.385276  |
| 14 | -0.132558 | -0.966440 | -0.313348 |

---

|                                              |             |
|----------------------------------------------|-------------|
| Zero-point correction=                       | 0.322807    |
| (Hartree/Particle)                           |             |
| Thermal correction to Energy=                | 0.341281    |
| Thermal correction to Enthalpy=              | 0.342226    |
| Thermal correction to Gibbs Free Energy=     | 0.278394    |
| Sum of electronic and zero-point Energies=   | -550.105236 |
| Sum of electronic and thermal Energies=      | -550.086762 |
| Sum of electronic and thermal Enthalpies=    | -550.085818 |
| Sum of electronic and thermal Free Energies= | -550.149650 |

---

### Pro-Si-CH<sub>4</sub>

---

| Atomic<br>Number | Coordinates (Angstroms) |           |           |
|------------------|-------------------------|-----------|-----------|
|                  | X                       | Y         | Z         |
| 14               | 0.012501                | 1.185458  | -0.014518 |
| 6                | 2.257088                | 0.495346  | -0.004094 |
| 6                | 1.127311                | -0.211828 | -0.795126 |
| 6                | -1.026425               | -0.159257 | 0.945585  |
| 6                | -2.197671               | 0.390929  | 0.093624  |
| 6                | 1.760352                | 1.670197  | 0.522916  |
| 6                | -1.760942               | 1.508257  | -0.589749 |
| 6                | -3.557918               | -0.262139 | 0.052840  |
| 1                | -4.263281               | 0.272463  | -0.593976 |
| 1                | -3.478803               | -1.298893 | -0.305214 |
| 1                | -3.990695               | -0.309100 | 1.062417  |
| 6                | -2.481411               | 2.387696  | -1.574871 |

|    |           |           |           |
|----|-----------|-----------|-----------|
| 1  | -1.988763 | 2.374867  | -2.558070 |
| 1  | -3.524622 | 2.075645  | -1.720333 |
| 1  | -2.491668 | 3.434230  | -1.238815 |
| 6  | -1.300193 | -0.206646 | 2.456677  |
| 1  | -1.687420 | 0.755637  | 2.825737  |
| 1  | -2.040857 | -0.979586 | 2.717057  |
| 1  | -0.385781 | -0.435421 | 3.020598  |
| 6  | 1.432885  | -0.428199 | -2.285012 |
| 1  | 1.771104  | 0.504095  | -2.762813 |
| 1  | 2.223450  | -1.180014 | -2.438847 |
| 1  | 0.546641  | -0.775665 | -2.832778 |
| 6  | 3.636459  | -0.095839 | 0.149028  |
| 1  | 4.301677  | 0.534289  | 0.750653  |
| 1  | 3.577111  | -1.086932 | 0.622478  |
| 1  | 4.104557  | -0.242531 | -0.835008 |
| 6  | 2.423066  | 2.700304  | 1.395786  |
| 1  | 1.901260  | 2.805016  | 2.358047  |
| 1  | 3.470431  | 2.446926  | 1.609420  |
| 1  | 2.411618  | 3.690614  | 0.918739  |
| 14 | 0.087132  | -1.554309 | 0.162141  |
| 1  | 0.840263  | -2.262628 | 1.243991  |
| 6  | -0.744248 | -2.831401 | -0.973192 |
| 1  | 0.005933  | -3.442465 | -1.492867 |
| 1  | -1.387581 | -3.508854 | -0.396293 |
| 1  | -1.364345 | -2.342204 | -1.735426 |

---

|                                              |             |
|----------------------------------------------|-------------|
| Zero-point correction=                       | 0.313353    |
| (Hartree/Particle)                           |             |
| Thermal correction to Energy=                | 0.333323    |
| Thermal correction to Enthalpy=              | 0.334267    |
| Thermal correction to Gibbs Free Energy=     | 0.266929    |
| Sum of electronic and zero-point Energies=   | -515.928437 |
| Sum of electronic and thermal Energies=      | -515.908468 |
| Sum of electronic and thermal Enthalpies=    | -515.907524 |
| Sum of electronic and thermal Free Energies= | -515.974862 |

---

## Pro-Ge-CH<sub>4</sub>

---

Atomic Coordinates (Angstroms)

| Number | X         | Y         | Z         |
|--------|-----------|-----------|-----------|
| 14     | 0.016783  | 1.167702  | -0.008721 |
| 6      | 2.274302  | 0.510656  | -0.006614 |
| 6      | 1.154357  | -0.200976 | -0.802887 |
| 6      | -1.043127 | -0.144561 | 0.968872  |
| 6      | -2.206986 | 0.404447  | 0.110275  |
| 6      | 1.758158  | 1.670982  | 0.535163  |
| 6      | -1.752377 | 1.502333  | -0.593555 |
| 6      | -3.577908 | -0.226352 | 0.083166  |
| 1      | -4.273685 | 0.304907  | -0.576641 |
| 1      | -3.515794 | -1.272391 | -0.250858 |
| 1      | -4.012466 | -0.243103 | 1.093002  |
| 6      | -2.459284 | 2.373760  | -1.595494 |
| 1      | -1.970618 | 2.329395  | -2.579883 |
| 1      | -3.509086 | 2.079535  | -1.730731 |
| 1      | -2.447585 | 3.427633  | -1.283130 |
| 6      | -1.307655 | -0.175393 | 2.481813  |
| 1      | -1.675477 | 0.797203  | 2.845286  |
| 1      | -2.060849 | -0.932008 | 2.753352  |
| 1      | -0.394230 | -0.414857 | 3.042918  |
| 6      | 1.452612  | -0.408214 | -2.295331 |
| 1      | 1.773412  | 0.530867  | -2.773195 |
| 1      | 2.253768  | -1.146785 | -2.457138 |
| 1      | 0.567851  | -0.767202 | -2.838266 |
| 6      | 3.665496  | -0.055749 | 0.133789  |
| 1      | 4.322313  | 0.582708  | 0.735790  |
| 1      | 3.628205  | -1.051119 | 0.600798  |
| 1      | 4.130310  | -0.186721 | -0.854051 |
| 6      | 2.405261  | 2.701605  | 1.419087  |
| 1      | 1.891118  | 2.777412  | 2.388343  |
| 1      | 3.460664  | 2.470350  | 1.617962  |
| 1      | 2.364856  | 3.699466  | 0.959517  |
| 32     | 0.091102  | -1.628389 | 0.173104  |
| 1      | 0.866204  | -2.381469 | 1.298717  |
| 6      | -0.785067 | -2.928487 | -1.032408 |
| 1      | -0.035921 | -3.530118 | -1.563020 |
| 1      | -1.429155 | -3.608534 | -0.460601 |
| 1      | -1.401285 | -2.410473 | -1.777700 |

Zero-point correction= 0.311416  
(Hartree/Particle)  
Thermal correction to Energy= 0.331880  
Thermal correction to Enthalpy= 0.332824  
Thermal correction to Gibbs Free Energy= 0.264131  
Sum of electronic and zero-point Energies= -515.810828  
Sum of electronic and thermal Energies= -515.790364  
Sum of electronic and thermal Enthalpies= -515.789419  
Sum of electronic and thermal Free Energies= -515.858112

---

### Pro-Sn-CH<sub>4</sub>

---

| Atomic<br>Number | Coordinates (Angstroms) |           |           |
|------------------|-------------------------|-----------|-----------|
|                  | X                       | Y         | Z         |
| 14               | 0.024364                | 1.123658  | 0.013375  |
| 6                | 2.307636                | 0.541155  | -0.016270 |
| 6                | 1.205034                | -0.194173 | -0.809419 |
| 6                | -1.087724               | -0.129785 | 1.014342  |
| 6                | -2.228879               | 0.438416  | 0.142080  |
| 6                | 1.751889                | 1.665886  | 0.562257  |
| 6                | -1.729618               | 1.497146  | -0.591970 |
| 6                | -3.625024               | -0.134402 | 0.134492  |
| 1                | -4.300330               | 0.409354  | -0.536288 |
| 1                | -3.607387               | -1.190232 | -0.174704 |
| 1                | -4.056524               | -0.109398 | 1.145407  |
| 6                | -2.401491               | 2.367394  | -1.619011 |
| 1                | -1.907575               | 2.285203  | -2.598390 |
| 1                | -3.459335               | 2.104291  | -1.756059 |
| 1                | -2.358078               | 3.427383  | -1.330979 |
| 6                | -1.346777               | -0.096136 | 2.530490  |
| 1                | -1.670522               | 0.905036  | 2.859608  |
| 1                | -2.131952               | -0.806991 | 2.831475  |
| 1                | -0.443760               | -0.353725 | 3.100685  |
| 6                | 1.480712                | -0.350377 | -2.314957 |
| 1                | 1.753066                | 0.614220  | -2.773959 |
| 1                | 2.308191                | -1.049249 | -2.513273 |
| 1                | 0.601209                | -0.731095 | -2.852389 |
| 6                | 3.726393                | 0.037548  | 0.080520  |

|    |           |           |           |
|----|-----------|-----------|-----------|
| 1  | 4.369181  | 0.698424  | 0.673456  |
| 1  | 3.747446  | -0.964108 | 0.535259  |
| 1  | 4.170075  | -0.060170 | -0.920640 |
| 6  | 2.370735  | 2.699764  | 1.462936  |
| 1  | 1.865943  | 2.733981  | 2.439505  |
| 1  | 3.436355  | 2.504257  | 1.645012  |
| 1  | 2.287584  | 3.706022  | 1.028031  |
| 50 | 0.095884  | -1.805446 | 0.207079  |
| 1  | 0.926723  | -2.660806 | 1.462045  |
| 6  | -0.839491 | -3.190967 | -1.143859 |
| 1  | -0.080488 | -3.769951 | -1.685107 |
| 1  | -1.481124 | -3.890448 | -0.593741 |
| 1  | -1.454125 | -2.653618 | -1.876310 |

---

|                                              |             |
|----------------------------------------------|-------------|
| Zero-point correction=                       | 0.309065    |
| (Hartree/Particle)                           |             |
| Thermal correction to Energy=                | 0.330150    |
| Thermal correction to Enthalpy=              | 0.331094    |
| Thermal correction to Gibbs Free Energy=     | 0.260371    |
| Sum of electronic and zero-point Energies=   | -515.406849 |
| Sum of electronic and thermal Energies=      | -515.385763 |
| Sum of electronic and thermal Enthalpies=    | -515.384819 |
| Sum of electronic and thermal Free Energies= | -515.455542 |

---

### Pro-Pb-CH<sub>4</sub>

---

| Atomic<br>Number | Coordinates (Angstroms) |           |           |
|------------------|-------------------------|-----------|-----------|
|                  | X                       | Y         | Z         |
| 14               | 0.026777                | 1.120087  | 0.020138  |
| 6                | 2.319228                | 0.560277  | -0.020442 |
| 6                | 1.217989                | -0.167965 | -0.814438 |
| 6                | -1.102298               | -0.098318 | 1.029410  |
| 6                | -2.237901               | 0.461295  | 0.151331  |
| 6                | 1.753197                | 1.673156  | 0.572353  |
| 6                | -1.724738               | 1.505918  | -0.594191 |
| 6                | -3.638781               | -0.099271 | 0.146463  |
| 1                | -4.306820               | 0.442612  | -0.532977 |
| 1                | -3.628883               | -1.158512 | -0.151422 |

|    |           |           |           |
|----|-----------|-----------|-----------|
| 1  | -4.074017 | -0.059621 | 1.155299  |
| 6  | -2.385708 | 2.372723  | -1.630857 |
| 1  | -1.890996 | 2.275151  | -2.608551 |
| 1  | -3.446319 | 2.120440  | -1.767039 |
| 1  | -2.330515 | 3.435207  | -1.353868 |
| 6  | -1.356177 | -0.084023 | 2.544296  |
| 1  | -1.670594 | 0.916208  | 2.886929  |
| 1  | -2.147348 | -0.790843 | 2.838123  |
| 1  | -0.454035 | -0.355938 | 3.108674  |
| 6  | 1.483490  | -0.346829 | -2.317019 |
| 1  | 1.751605  | 0.612040  | -2.791667 |
| 1  | 2.311340  | -1.046202 | -2.510923 |
| 1  | 0.601003  | -0.736095 | -2.842808 |
| 6  | 3.743081  | 0.069312  | 0.064887  |
| 1  | 4.382264  | 0.731705  | 0.659974  |
| 1  | 3.775754  | -0.935260 | 0.512333  |
| 1  | 4.183065  | -0.016756 | -0.938988 |
| 6  | 2.365511  | 2.704419  | 1.480111  |
| 1  | 1.870025  | 2.718079  | 2.462097  |
| 1  | 3.435820  | 2.523289  | 1.649144  |
| 1  | 2.262281  | 3.715067  | 1.059833  |
| 82 | 0.094859  | -1.860325 | 0.218620  |
| 1  | 0.935586  | -2.738057 | 1.505223  |
| 6  | -0.857508 | -3.285014 | -1.183678 |
| 1  | -0.082804 | -3.811294 | -1.753323 |
| 1  | -1.451326 | -4.012660 | -0.618836 |
| 1  | -1.507889 | -2.735942 | -1.873485 |

---

|                                              |             |
|----------------------------------------------|-------------|
| Zero-point correction=                       | 0.307812    |
| (Hartree/Particle)                           |             |
| Thermal correction to Energy=                | 0.329352    |
| Thermal correction to Enthalpy=              | 0.330296    |
| Thermal correction to Gibbs Free Energy=     | 0.257534    |
| Sum of electronic and zero-point Energies=   | -515.467372 |
| Sum of electronic and thermal Energies=      | -515.445832 |
| Sum of electronic and thermal Enthalpies=    | -515.444888 |
| Sum of electronic and thermal Free Energies= | -515.517650 |

---

**Pro-C-H<sub>2</sub>O**



---

| Atomic<br>Number | Coordinates (Angstroms) |           |           |
|------------------|-------------------------|-----------|-----------|
|                  | X                       | Y         | Z         |
| 6                | -2.213457               | 0.117076  | -0.053058 |
| 6                | -0.891524               | 0.776182  | -0.537756 |
| 6                | 0.822958                | 0.070199  | 1.041830  |
| 6                | 2.042327                | -0.276671 | 0.140060  |
| 6                | -2.011284               | -1.243525 | 0.028657  |
| 6                | 1.658430                | -1.247662 | -0.761092 |
| 6                | 3.371198                | 0.423990  | 0.263655  |
| 1                | 4.112269                | 0.052537  | -0.453901 |
| 1                | 3.223368                | 1.499633  | 0.106596  |
| 1                | 3.782390                | 0.298600  | 1.276011  |
| 6                | 2.437449                | -1.923425 | -1.854441 |
| 1                | 2.006987                | -1.710332 | -2.843906 |
| 1                | 3.486547                | -1.598179 | -1.869166 |
| 1                | 2.428598                | -3.015819 | -1.730996 |
| 6                | 1.050605                | -0.137304 | 2.537449  |
| 1                | 1.494957                | -1.120415 | 2.743433  |
| 1                | 1.725965                | 0.628133  | 2.952112  |
| 1                | 0.104514                | -0.075070 | 3.093165  |
| 6                | -0.999831               | 1.619239  | -1.805120 |
| 1                | -1.511472               | 1.064089  | -2.602244 |
| 1                | -1.571807               | 2.550249  | -1.642232 |
| 1                | -0.007037               | 1.900453  | -2.176035 |
| 6                | -3.445751               | 0.911830  | 0.307465  |
| 1                | -4.265405               | 0.279146  | 0.667362  |
| 1                | -3.216476               | 1.650105  | 1.090706  |
| 1                | -3.809902               | 1.476959  | -0.563018 |
| 6                | -2.938720               | -2.343501 | 0.463267  |
| 1                | -2.539059               | -2.879533 | 1.336474  |
| 1                | -3.934765               | -1.963500 | 0.729404  |
| 1                | -3.069307               | -3.088757 | -0.334437 |
| 6                | 0.012157                | 1.359981  | 0.644611  |
| 1                | -0.602855               | 1.686182  | 1.502343  |
| 14               | -0.147680               | -0.979860 | -0.258971 |
| 8                | 0.901886                | 2.454991  | 0.249273  |
| 1                | 0.376528                | 3.226724  | -0.051912 |

---

Zero-point correction= 0.298613  
(Hartree/Particle)  
Thermal correction to Energy= 0.316787  
Thermal correction to Enthalpy= 0.317731  
Thermal correction to Gibbs Free Energy= 0.254792  
Sum of electronic and zero-point Energies= -586.034291  
Sum of electronic and thermal Energies= -586.016117  
Sum of electronic and thermal Enthalpies= -586.015173  
Sum of electronic and thermal Free Energies= -586.078112

---

## Pro-Si-H<sub>2</sub>O

---

| Atomic<br>Number | Coordinates (Angstroms) |           |           |
|------------------|-------------------------|-----------|-----------|
|                  | X                       | Y         | Z         |
| 14               | -0.407217               | 1.409356  | 0.125059  |
| 6                | -2.371072               | 0.105674  | 0.156318  |
| 6                | -1.029240               | -0.312504 | 0.808924  |
| 6                | 0.906335                | 0.486031  | -0.994023 |
| 6                | 1.923766                | 1.235533  | -0.095793 |
| 6                | -2.258807               | 1.408202  | -0.283561 |
| 6                | 1.240458                | 2.145395  | 0.684743  |
| 6                | 3.393058                | 0.900694  | -0.097164 |
| 1                | 3.971167                | 1.531939  | 0.587536  |
| 1                | 3.526243                | -0.150748 | 0.193366  |
| 1                | 3.815775                | 1.013331  | -1.105812 |
| 6                | 1.745496                | 3.088336  | 1.741652  |
| 1                | 1.310527                | 2.858592  | 2.725296  |
| 1                | 2.838292                | 3.042777  | 1.841394  |
| 1                | 1.475247                | 4.127943  | 1.508318  |
| 6                | 1.129571                | 0.662514  | -2.503077 |
| 1                | 1.224835                | 1.725746  | -2.769633 |
| 1                | 2.045158                | 0.153820  | -2.842240 |
| 1                | 0.295051                | 0.248407  | -3.085434 |
| 6                | -1.120749               | -0.741615 | 2.280395  |
| 1                | -1.655729               | 0.007937  | 2.882857  |
| 1                | -1.654992               | -1.698078 | 2.400011  |
| 1                | -0.122508               | -0.868385 | 2.719634  |
| 6                | -3.544484               | -0.833979 | 0.030504  |

|    |           |           |           |
|----|-----------|-----------|-----------|
| 1  | -4.404618 | -0.371379 | -0.466958 |
| 1  | -3.258916 | -1.731825 | -0.537687 |
| 1  | -3.869875 | -1.177854 | 1.022873  |
| 6  | -3.244975 | 2.277921  | -1.013054 |
| 1  | -2.850079 | 2.599996  | -1.987528 |
| 1  | -4.197162 | 1.760719  | -1.192760 |
| 1  | -3.465491 | 3.191298  | -0.442619 |
| 8  | 1.455756  | -2.071738 | 0.518975  |
| 1  | 1.324224  | -2.909860 | 0.991334  |
| 14 | 0.256551  | -1.197252 | -0.340625 |
| 1  | -0.325006 | -2.055697 | -1.422531 |

---

|                                              |             |
|----------------------------------------------|-------------|
| Zero-point correction=                       | 0.289599    |
| (Hartree/Particle)                           |             |
| Thermal correction to Energy=                | 0.309275    |
| Thermal correction to Enthalpy=              | 0.310219    |
| Thermal correction to Gibbs Free Energy=     | 0.243596    |
| Sum of electronic and zero-point Energies=   | -551.888980 |
| Sum of electronic and thermal Energies=      | -551.869304 |
| Sum of electronic and thermal Enthalpies=    | -551.868360 |
| Sum of electronic and thermal Free Energies= | -551.934983 |

---

## Pro-Ge-H<sub>2</sub>O

---

| Atomic<br>Number | Coordinates (Angstroms) |           |           |
|------------------|-------------------------|-----------|-----------|
|                  | X                       | Y         | Z         |
| 14               | -0.411413               | 1.396350  | 0.109628  |
| 6                | -2.397866               | 0.120433  | 0.155829  |
| 6                | -1.062295               | -0.307592 | 0.808860  |
| 6                | 0.910696                | 0.513234  | -1.028202 |
| 6                | 1.924398                | 1.245991  | -0.115049 |
| 6                | -2.264641               | 1.417306  | -0.296485 |
| 6                | 1.232105                | 2.132521  | 0.684821  |
| 6                | 3.396596                | 0.924944  | -0.122470 |
| 1                | 3.968860                | 1.552164  | 0.570749  |
| 1                | 3.540421                | -0.128889 | 0.154818  |
| 1                | 3.817968                | 1.055595  | -1.129558 |
| 6                | 1.729033                | 3.056058  | 1.762309  |

|    |           |           |           |
|----|-----------|-----------|-----------|
| 1  | 1.297201  | 2.799573  | 2.740656  |
| 1  | 2.822237  | 3.019022  | 1.860429  |
| 1  | 1.448276  | 4.097985  | 1.553068  |
| 6  | 1.125989  | 0.710362  | -2.535635 |
| 1  | 1.213455  | 1.778225  | -2.787988 |
| 1  | 2.043790  | 0.213428  | -2.885335 |
| 1  | 0.291666  | 0.300204  | -3.121126 |
| 6  | -1.145653 | -0.729974 | 2.282446  |
| 1  | -1.666043 | 0.029461  | 2.886373  |
| 1  | -1.691598 | -1.678360 | 2.410457  |
| 1  | -0.145492 | -0.868378 | 2.713183  |
| 6  | -3.590133 | -0.797722 | 0.049920  |
| 1  | -4.442696 | -0.326495 | -0.452412 |
| 1  | -3.325169 | -1.711044 | -0.503455 |
| 1  | -3.918526 | -1.118274 | 1.049087  |
| 6  | -3.240006 | 2.297959  | -1.027447 |
| 1  | -2.846702 | 2.603376  | -2.007986 |
| 1  | -4.203375 | 1.797481  | -1.194761 |
| 1  | -3.438760 | 3.220940  | -0.464397 |
| 32 | 0.262669  | -1.263232 | -0.378102 |
| 1  | -0.305650 | -2.204909 | -1.488352 |
| 8  | 1.543351  | -2.125012 | 0.558757  |
| 1  | 1.414197  | -2.983587 | 0.999335  |

---

|                                              |             |
|----------------------------------------------|-------------|
| Zero-point correction=                       | 0.287499    |
| (Hartree/Particle)                           |             |
| Thermal correction to Energy=                | 0.307727    |
| Thermal correction to Enthalpy=              | 0.308671    |
| Thermal correction to Gibbs Free Energy=     | 0.240498    |
| Sum of electronic and zero-point Energies=   | -551.767836 |
| Sum of electronic and thermal Energies=      | -551.747609 |
| Sum of electronic and thermal Enthalpies=    | -551.746665 |
| Sum of electronic and thermal Free Energies= | -551.814837 |

---

## Pro-Sn-H<sub>2</sub>O

---

| Atomic<br>Number | Coordinates (Angstroms) |   |   |
|------------------|-------------------------|---|---|
|                  | X                       | Y | Z |

---

|    |           |           |           |
|----|-----------|-----------|-----------|
| 14 | -0.406506 | 1.335178  | 0.097638  |
| 6  | -2.442920 | 0.136648  | 0.170258  |
| 6  | -1.125439 | -0.330584 | 0.825705  |
| 6  | 0.942477  | 0.518823  | -1.058963 |
| 6  | 1.938054  | 1.263455  | -0.139190 |
| 6  | -2.254976 | 1.415081  | -0.316360 |
| 6  | 1.218571  | 2.098755  | 0.691796  |
| 6  | 3.423913  | 1.013386  | -0.173706 |
| 1  | 3.977222  | 1.669564  | 0.507963  |
| 1  | 3.628659  | -0.030288 | 0.105935  |
| 1  | 3.820217  | 1.161374  | -1.188337 |
| 6  | 1.689554  | 3.010677  | 1.790857  |
| 1  | 1.276189  | 2.710269  | 2.764759  |
| 1  | 2.784180  | 3.013700  | 1.880590  |
| 1  | 1.366550  | 4.046406  | 1.613739  |
| 6  | 1.126872  | 0.770618  | -2.564533 |
| 1  | 1.172241  | 1.849420  | -2.784123 |
| 1  | 2.056368  | 0.321065  | -2.945749 |
| 1  | 0.299089  | 0.351313  | -3.153495 |
| 6  | -1.212541 | -0.706311 | 2.314210  |
| 1  | -1.675937 | 0.101729  | 2.903215  |
| 1  | -1.814796 | -1.613846 | 2.475800  |
| 1  | -0.217551 | -0.899331 | 2.735030  |
| 6  | -3.679349 | -0.724934 | 0.100856  |
| 1  | -4.516606 | -0.222011 | -0.396489 |
| 1  | -3.468527 | -1.660303 | -0.439131 |
| 1  | -4.005458 | -1.011416 | 1.110917  |
| 6  | -3.196674 | 2.317833  | -1.064993 |
| 1  | -2.799448 | 2.577143  | -2.057322 |
| 1  | -4.183372 | 1.857229  | -1.210074 |
| 1  | -3.348616 | 3.264933  | -0.527913 |
| 50 | 0.305154  | -1.459389 | -0.395222 |
| 1  | -0.200004 | -2.599010 | -1.602903 |
| 8  | 1.624968  | -2.288892 | 0.758605  |
| 1  | 1.785332  | -3.219141 | 0.982595  |

---

Zero-point correction= 0.285106

(Hartree/Particle)

Thermal correction to Energy= 0.306038

Thermal correction to Enthalpy= 0.306982

|                                              |             |
|----------------------------------------------|-------------|
| Thermal correction to Gibbs Free Energy=     | 0.236472    |
| Sum of electronic and zero-point Energies=   | -551.368692 |
| Sum of electronic and thermal Energies=      | -551.347760 |
| Sum of electronic and thermal Enthalpies=    | -551.346815 |
| Sum of electronic and thermal Free Energies= | -551.417326 |

---

## Pro-Pb-H<sub>2</sub>O

---

| Atomic<br>Number | Coordinates (Angstroms) |           |           |
|------------------|-------------------------|-----------|-----------|
|                  | X                       | Y         | Z         |
| 14               | -0.413750               | 1.330784  | 0.079898  |
| 6                | -2.469798               | 0.155347  | 0.173105  |
| 6                | -1.154433               | -0.307647 | 0.823052  |
| 6                | 0.936313                | 0.558700  | -1.089144 |
| 6                | 1.935325                | 1.270267  | -0.154263 |
| 6                | -2.267144               | 1.426904  | -0.327845 |
| 6                | 1.211642                | 2.090061  | 0.689073  |
| 6                | 3.417666                | 1.003090  | -0.177351 |
| 1                | 3.972398                | 1.652548  | 0.509445  |
| 1                | 3.602058                | -0.042666 | 0.109078  |
| 1                | 3.826594                | 1.143282  | -1.187955 |
| 6                | 1.678293                | 2.982445  | 1.805120  |
| 1                | 1.267591                | 2.659130  | 2.772844  |
| 1                | 2.772837                | 2.990295  | 1.893893  |
| 1                | 1.348194                | 4.019434  | 1.649766  |
| 6                | 1.126029                | 0.797899  | -2.593026 |
| 1                | 1.178882                | 1.876064  | -2.816849 |
| 1                | 2.054548                | 0.342650  | -2.968842 |
| 1                | 0.296951                | 0.381816  | -3.181903 |
| 6                | -1.209510               | -0.719091 | 2.300207  |
| 1                | -1.645327               | 0.083018  | 2.918733  |
| 1                | -1.824106               | -1.619053 | 2.455345  |
| 1                | -0.206978               | -0.938159 | 2.687508  |
| 6                | -3.717004               | -0.691616 | 0.122039  |
| 1                | -4.551023               | -0.183511 | -0.375308 |
| 1                | -3.521669               | -1.635106 | -0.409529 |
| 1                | -4.039953               | -0.963535 | 1.137090  |
| 6                | -3.203746               | 2.336530  | -1.073706 |
| 1                | -2.811971               | 2.583561  | -2.071447 |

|    |           |           |           |
|----|-----------|-----------|-----------|
| 1  | -4.198044 | 1.888718  | -1.206352 |
| 1  | -3.337559 | 3.289743  | -0.542540 |
| 82 | 0.315207  | -1.513308 | -0.430968 |
| 1  | -0.072884 | -2.812094 | -1.586902 |
| 8  | 1.708288  | -2.224398 | 0.864560  |
| 1  | 1.882973  | -3.172961 | 1.015141  |

---

|                                              |             |
|----------------------------------------------|-------------|
| Zero-point correction=                       | 0.283883    |
| (Hartree/Particle)                           |             |
| Thermal correction to Energy=                | 0.305114    |
| Thermal correction to Enthalpy=              | 0.306058    |
| Thermal correction to Gibbs Free Energy=     | 0.234474    |
| Sum of electronic and zero-point Energies=   | -551.423434 |
| Sum of electronic and thermal Energies=      | -551.402203 |
| Sum of electronic and thermal Enthalpies=    | -551.401259 |
| Sum of electronic and thermal Free Energies= | -551.472842 |

---

## Dimer-C

---

| Atomic<br>Number | Coordinates (Angstroms) |           |           |
|------------------|-------------------------|-----------|-----------|
|                  | X                       | Y         | Z         |
| 6                | -2.362550               | 2.169830  | 0.392450  |
| 6                | -1.672144               | 1.107641  | -0.523845 |
| 6                | -1.672894               | -1.116332 | 0.522459  |
| 6                | -2.378262               | -2.168582 | -0.393848 |
| 6                | -3.577392               | 1.662269  | 0.806381  |
| 6                | -3.594937               | -1.653028 | -0.791748 |
| 6                | -1.815959               | -3.538896 | -0.685973 |
| 1                | -2.522584               | -4.166836 | -1.241014 |
| 1                | -0.885881               | -3.479196 | -1.263640 |
| 1                | -1.571165               | -4.053049 | 0.255162  |
| 6                | -4.666368               | -2.256701 | -1.657453 |
| 1                | -4.795410               | -1.692704 | -2.592730 |
| 1                | -4.440450               | -3.297967 | -1.925674 |
| 1                | -5.638286               | -2.249803 | -1.143948 |
| 6                | -1.344865               | -1.632399 | 1.929447  |
| 1                | -2.194217               | -2.189136 | 2.351725  |

|    |           |           |           |
|----|-----------|-----------|-----------|
| 1  | -0.470437 | -2.296229 | 1.947022  |
| 1  | -1.121643 | -0.792643 | 2.599943  |
| 6  | -1.354259 | 1.610325  | -1.938038 |
| 1  | -2.199689 | 2.178549  | -2.352764 |
| 1  | -0.468647 | 2.258519  | -1.971240 |
| 1  | -1.154184 | 0.762657  | -2.605908 |
| 6  | -1.795557 | 3.541885  | 0.667430  |
| 1  | -2.499140 | 4.177523  | 1.217693  |
| 1  | -0.863583 | 3.487739  | 1.242426  |
| 1  | -1.552936 | 4.044931  | -0.280161 |
| 6  | -4.637331 | 2.278076  | 1.677800  |
| 1  | -4.775389 | 1.709711  | 2.609058  |
| 1  | -4.392879 | 3.313286  | 1.953225  |
| 1  | -5.609713 | 2.292121  | 1.165114  |
| 6  | -0.686242 | -0.006088 | -0.003101 |
| 14 | -3.169956 | 0.001500  | 0.008894  |
| 1  | 2.495210  | 4.169277  | -1.239502 |
| 6  | 1.793903  | 3.535750  | -0.683840 |
| 6  | 2.365296  | 2.168282  | -0.395608 |
| 1  | 0.862781  | 3.471128  | -1.259352 |
| 1  | 1.548020  | 4.046431  | 0.258927  |
| 6  | 1.669191  | 1.109333  | 0.519941  |
| 6  | 3.584318  | 1.661377  | -0.797522 |
| 6  | 1.341380  | 1.618471  | 1.929751  |
| 6  | 0.686833  | -0.005097 | -0.004155 |
| 14 | 3.170520  | 0.002189  | 0.000113  |
| 6  | 4.650717  | 2.275538  | -1.662014 |
| 1  | 2.183354  | 2.188929  | 2.348455  |
| 1  | 0.455383  | 2.266331  | 1.952460  |
| 1  | 1.135977  | 0.774328  | 2.600513  |
| 6  | 1.676886  | -1.114636 | -0.526091 |
| 6  | 3.589127  | -1.653358 | 0.802005  |
| 1  | 4.796935  | 1.704601  | -2.590395 |
| 1  | 4.407835  | 3.309736  | -1.942260 |
| 1  | 5.618785  | 2.291880  | -1.141321 |
| 6  | 2.376533  | -2.169047 | 0.392238  |
| 6  | 1.355586  | -1.630081 | -1.934554 |
| 6  | 4.653673  | -2.258629 | 1.674876  |
| 6  | 1.816469  | -3.543418 | 0.670493  |
| 1  | 2.212076  | -2.174342 | -2.358704 |



|   |          |           |           |
|---|----------|-----------|-----------|
| 1 | 0.490639 | -2.306467 | -1.952677 |
| 1 | 1.120500 | -0.791766 | -2.602639 |
| 1 | 4.771937 | -1.699042 | 2.614341  |
| 1 | 4.427460 | -3.301895 | 1.935558  |
| 1 | 5.630566 | -2.246704 | 1.170922  |
| 1 | 2.519578 | -4.171941 | 1.229351  |
| 1 | 0.879528 | -3.491881 | 1.237722  |
| 1 | 1.584848 | -4.052620 | -0.276684 |

---

|                                              |              |
|----------------------------------------------|--------------|
| Zero-point correction=                       | 0.544775     |
| (Hartree/Particle)                           |              |
| Thermal correction to Energy=                | 0.579421     |
| Thermal correction to Enthalpy=              | 0.580365     |
| Thermal correction to Gibbs Free Energy=     | 0.480685     |
| Sum of electronic and zero-point Energies=   | -1019.229245 |
| Sum of electronic and thermal Energies=      | -1019.194599 |
| Sum of electronic and thermal Enthalpies=    | -1019.193654 |
| Sum of electronic and thermal Free Energies= | -1019.293334 |

---

## Dimer-Si

---

| Atomic<br>Number | Coordinates (Angstroms) |           |           |
|------------------|-------------------------|-----------|-----------|
|                  | X                       | Y         | Z         |
| 14               | -1.062177               | 0.035046  | -0.428581 |
| 14               | -3.724671               | 0.018532  | 0.238863  |
| 6                | -3.320004               | -1.726700 | -1.282672 |
| 6                | -2.387204               | -1.362494 | -0.094605 |
| 6                | -2.410423               | 1.417974  | -0.103712 |
| 6                | -2.686606               | 1.796400  | 1.376502  |
| 6                | -4.485034               | -0.997117 | -1.163061 |
| 6                | -3.752473               | 1.043038  | 1.825994  |
| 6                | -1.864038               | 2.811646  | 2.128408  |
| 1                | -2.192484               | 2.933459  | 3.167093  |
| 1                | -0.805738               | 2.514093  | 2.132626  |
| 1                | -1.919444               | 3.793289  | 1.635840  |
| 6                | -4.400079               | 0.989820  | 3.182586  |
| 1                | -4.285265               | -0.003866 | 3.641435  |
| 1                | -3.968632               | 1.727869  | 3.872777  |

|    |           |           |           |
|----|-----------|-----------|-----------|
| 1  | -5.479974 | 1.186902  | 3.116980  |
| 6  | -2.523261 | 2.586100  | -1.093800 |
| 1  | -3.457545 | 3.148297  | -0.940072 |
| 1  | -1.688986 | 3.296476  | -0.983572 |
| 1  | -2.511441 | 2.231486  | -2.132991 |
| 6  | -2.017855 | -2.552235 | 0.802255  |
| 1  | -2.910162 | -3.142460 | 1.064297  |
| 1  | -1.308012 | -3.233663 | 0.306901  |
| 1  | -1.547365 | -2.213469 | 1.734089  |
| 6  | -2.921488 | -2.701595 | -2.362099 |
| 1  | -3.708302 | -2.844244 | -3.112150 |
| 1  | -2.012660 | -2.350668 | -2.873786 |
| 1  | -2.681268 | -3.683138 | -1.927573 |
| 6  | -5.698793 | -0.955484 | -2.050033 |
| 1  | -5.864762 | 0.054012  | -2.453340 |
| 1  | -5.611421 | -1.645135 | -2.900596 |
| 1  | -6.606295 | -1.228166 | -1.492831 |
| 14 | 1.030785  | 0.006093  | 0.248313  |
| 6  | 2.352946  | -1.400123 | -0.039424 |
| 6  | 2.421254  | 1.372070  | 0.097996  |
| 14 | 3.745168  | -0.040924 | -0.153087 |
| 6  | 3.141131  | -1.851091 | 1.221958  |
| 6  | 2.053550  | -2.526050 | -1.038764 |
| 6  | 2.860701  | 1.790182  | -1.332806 |
| 6  | 2.455373  | 2.510620  | 1.127983  |
| 6  | 4.322239  | -1.139968 | 1.275089  |
| 6  | 3.964931  | 1.040671  | -1.685963 |
| 6  | 2.604580  | -2.871649 | 2.193499  |
| 1  | 2.953190  | -3.129665 | -1.237328 |
| 1  | 1.274981  | -3.209270 | -0.664126 |
| 1  | 1.697444  | -2.121637 | -1.995221 |
| 6  | 2.129232  | 2.831040  | -2.142248 |
| 1  | 3.412987  | 3.052441  | 1.087217  |
| 1  | 1.654492  | 3.246258  | 0.953175  |
| 1  | 2.328552  | 2.129217  | 2.149829  |
| 6  | 5.424368  | -1.166859 | 2.298342  |
| 6  | 4.762634  | 1.026827  | -2.961195 |
| 1  | 3.293300  | -3.068753 | 3.023231  |
| 1  | 1.645967  | -2.528986 | 2.610575  |
| 1  | 2.404483  | -3.824270 | 1.682006  |

|   |          |           |           |
|---|----------|-----------|-----------|
| 1 | 2.586076 | 2.995681  | -3.125221 |
| 1 | 1.083234 | 2.527200  | -2.293607 |
| 1 | 2.110222 | 3.792670  | -1.609379 |
| 1 | 5.544294 | -0.186810 | 2.782636  |
| 1 | 5.235683 | -1.908176 | 3.086761  |
| 1 | 6.390445 | -1.412764 | 1.835285  |
| 1 | 4.697004 | 0.049877  | -3.462777 |
| 1 | 4.417216 | 1.790827  | -3.671396 |
| 1 | 5.828648 | 1.212500  | -2.765275 |

---

|                                              |             |
|----------------------------------------------|-------------|
| Zero-point correction=                       | 0.536199    |
| (Hartree/Particle)                           |             |
| Thermal correction to Energy=                | 0.572812    |
| Thermal correction to Enthalpy=              | 0.573756    |
| Thermal correction to Gibbs Free Energy=     | 0.468142    |
| Sum of electronic and zero-point Energies=   | -950.871114 |
| Sum of electronic and thermal Energies=      | -950.834501 |
| Sum of electronic and thermal Enthalpies=    | -950.833557 |
| Sum of electronic and thermal Free Energies= | -950.939171 |

---

## Dimer-Ge

---

| Atomic<br>Number | Coordinates (Angstroms) |           |           |
|------------------|-------------------------|-----------|-----------|
|                  | X                       | Y         | Z         |
| 32               | 1.106634                | -0.035541 | -0.585624 |
| 14               | 3.779617                | -0.008877 | 0.344140  |
| 6                | 3.523246                | 1.765018  | -1.180492 |
| 6                | 2.502396                | 1.394174  | -0.077566 |
| 6                | 2.536620                | -1.439613 | -0.080015 |
| 6                | 2.697131                | -1.800968 | 1.416620  |
| 6                | 4.659438                | 1.003485  | -0.992926 |
| 6                | 3.707593                | -1.019009 | 1.941721  |
| 6                | 1.844704                | -2.830096 | 2.115491  |
| 1                | 2.111267                | -2.948336 | 3.172151  |
| 1                | 0.783603                | -2.547388 | 2.058069  |
| 1                | 1.942659                | -3.810341 | 1.627081  |
| 6                | 4.246548                | -0.943673 | 3.343921  |
| 1                | 4.096079                | 0.056046  | 3.777454  |

|    |           |           |           |
|----|-----------|-----------|-----------|
| 1  | 3.764364  | -1.672077 | 4.010090  |
| 1  | 5.328052  | -1.139525 | 3.365336  |
| 6  | 2.738246  | -2.605647 | -1.057518 |
| 1  | 3.664244  | -3.158434 | -0.831132 |
| 1  | 1.906881  | -3.326842 | -1.014721 |
| 1  | 2.807707  | -2.252575 | -2.095445 |
| 6  | 2.049609  | 2.565489  | 0.804967  |
| 1  | 2.911319  | 3.163645  | 1.143172  |
| 1  | 1.369459  | 3.245864  | 0.269054  |
| 1  | 1.516346  | 2.208164  | 1.695372  |
| 6  | 3.229019  | 2.776804  | -2.259676 |
| 1  | 4.069377  | 2.915512  | -2.949703 |
| 1  | 2.348473  | 2.468156  | -2.842734 |
| 1  | 2.986634  | 3.753314  | -1.816567 |
| 6  | 5.929545  | 0.945921  | -1.796464 |
| 1  | 6.099462  | -0.061408 | -2.203942 |
| 1  | 5.915463  | 1.650020  | -2.639844 |
| 1  | 6.803716  | 1.188537  | -1.175446 |
| 32 | -1.067681 | 0.007616  | 0.440106  |
| 6  | -2.485425 | 1.425428  | -0.029652 |
| 6  | -2.538278 | -1.401007 | 0.115279  |
| 14 | -3.810401 | 0.020978  | -0.251382 |
| 6  | -3.390295 | 1.869113  | 1.145628  |
| 6  | -2.110217 | 2.538127  | -1.017947 |
| 6  | -2.836732 | -1.816804 | -1.346622 |
| 6  | -2.656276 | -2.532023 | 1.146784  |
| 6  | -4.544170 | 1.111643  | 1.113517  |
| 6  | -3.893841 | -1.054450 | -1.804557 |
| 6  | -2.981840 | 2.932200  | 2.135201  |
| 1  | -2.998378 | 3.120637  | -1.312453 |
| 1  | -1.383749 | 3.244688  | -0.587438 |
| 1  | -1.660760 | 2.125274  | -1.930412 |
| 6  | -2.047252 | -2.870236 | -2.082451 |
| 1  | -3.610109 | -3.072058 | 1.036635  |
| 1  | -1.847256 | -3.271759 | 1.039759  |
| 1  | -2.608941 | -2.147084 | 2.174395  |
| 6  | -5.726551 | 1.109801  | 2.043513  |
| 6  | -4.565424 | -1.032676 | -3.150281 |
| 1  | -3.743456 | 3.111181  | 2.903254  |
| 1  | -2.044421 | 2.645845  | 2.635600  |

|   |           |           |           |
|---|-----------|-----------|-----------|
| 1 | -2.786055 | 3.883986  | 1.620752  |
| 1 | -2.416505 | -3.035329 | -3.101550 |
| 1 | -0.988386 | -2.578203 | -2.142235 |
| 1 | -2.085883 | -3.829174 | -1.545518 |
| 1 | -5.863556 | 0.125236  | 2.514138  |
| 1 | -5.619854 | 1.851724  | 2.847100  |
| 1 | -6.657470 | 1.335787  | 1.503923  |
| 1 | -4.460930 | -0.050347 | -3.634254 |
| 1 | -4.148165 | -1.786546 | -3.831923 |
| 1 | -5.643522 | -1.228026 | -3.058905 |

---

|                                              |             |
|----------------------------------------------|-------------|
| Zero-point correction=                       | 0.533412    |
| (Hartree/Particle)                           |             |
| Thermal correction to Energy=                | 0.571214    |
| Thermal correction to Enthalpy=              | 0.572158    |
| Thermal correction to Gibbs Free Energy=     | 0.462988    |
| Sum of electronic and zero-point Energies=   | -950.663962 |
| Sum of electronic and thermal Energies=      | -950.626160 |
| Sum of electronic and thermal Enthalpies=    | -950.625216 |
| Sum of electronic and thermal Free Energies= | -950.734386 |

---

## Dimer-Sn

---

| Atomic<br>Number | Coordinates (Angstroms) |           |           |
|------------------|-------------------------|-----------|-----------|
|                  | X                       | Y         | Z         |
| 14               | 3.993886                | 0.071078  | 0.447186  |
| 6                | 3.883167                | 1.766039  | -1.182160 |
| 6                | 2.760398                | 1.435083  | -0.177160 |
| 6                | 2.920955                | -1.492225 | 0.036997  |
| 6                | 2.974401                | -1.739747 | 1.559214  |
| 6                | 4.996409                | 1.017096  | -0.850128 |
| 6                | 3.844296                | -0.817238 | 2.111014  |
| 6                | 2.178558                | -2.814747 | 2.256531  |
| 1                | 2.373571                | -2.848345 | 3.334904  |
| 1                | 1.100358                | -2.651201 | 2.106439  |
| 1                | 2.412471                | -3.803602 | 1.836199  |
| 6                | 4.232145                | -0.587145 | 3.545824  |
| 1                | 3.945434                | 0.421206  | 3.879892  |

|    |           |           |           |
|----|-----------|-----------|-----------|
| 1  | 3.757295  | -1.310249 | 4.223169  |
| 1  | 5.320036  | -0.668389 | 3.682668  |
| 6  | 3.323387  | -2.689180 | -0.838961 |
| 1  | 4.287750  | -3.114224 | -0.513391 |
| 1  | 2.580367  | -3.500632 | -0.798506 |
| 1  | 3.430716  | -2.402235 | -1.894358 |
| 6  | 2.214907  | 2.640072  | 0.606212  |
| 1  | 3.035769  | 3.255285  | 1.012517  |
| 1  | 1.598024  | 3.298017  | -0.025353 |
| 1  | 1.588128  | 2.322490  | 1.450423  |
| 6  | 3.710012  | 2.742854  | -2.319261 |
| 1  | 4.623850  | 2.865576  | -2.912235 |
| 1  | 2.903163  | 2.412804  | -2.990939 |
| 1  | 3.416244  | 3.731242  | -1.937491 |
| 6  | 6.340006  | 0.928410  | -1.520481 |
| 1  | 6.553017  | -0.097212 | -1.855938 |
| 1  | 6.409385  | 1.587136  | -2.397124 |
| 1  | 7.147916  | 1.209298  | -0.829826 |
| 6  | -2.732076 | 1.482722  | -0.010512 |
| 6  | -2.938482 | -1.444198 | 0.112968  |
| 14 | -4.053216 | 0.090187  | -0.304013 |
| 6  | -3.702678 | 1.953910  | 1.092573  |
| 6  | -2.280337 | 2.570704  | -0.997705 |
| 6  | -3.195295 | -1.833693 | -1.358855 |
| 6  | -3.221560 | -2.551164 | 1.140824  |
| 6  | -4.855088 | 1.194902  | 1.008644  |
| 6  | -4.136670 | -0.961462 | -1.874329 |
| 6  | -3.362228 | 3.047256  | 2.075252  |
| 1  | -3.142860 | 3.140136  | -1.383889 |
| 1  | -1.595979 | 3.295601  | -0.529761 |
| 1  | -1.754512 | 2.139293  | -1.860404 |
| 6  | -2.494004 | -2.975611 | -2.051799 |
| 1  | -4.219237 | -2.994287 | 0.984378  |
| 1  | -2.487921 | -3.369628 | 1.077165  |
| 1  | -3.190025 | -2.168446 | 2.170468  |
| 6  | -6.088436 | 1.208839  | 1.870361  |
| 6  | -4.721347 | -0.869740 | -3.257331 |
| 1  | -4.177314 | 3.251331  | 2.779453  |
| 1  | -2.464412 | 2.777932  | 2.652127  |
| 1  | -3.126800 | 3.981813  | 1.546185  |

|    |           |           |           |
|----|-----------|-----------|-----------|
| 1  | -2.836418 | -3.112970 | -3.084393 |
| 1  | -1.407090 | -2.803248 | -2.069521 |
| 1  | -2.658635 | -3.917884 | -1.509299 |
| 1  | -6.258477 | 0.229733  | 2.342113  |
| 1  | -6.023808 | 1.958088  | 2.671682  |
| 1  | -6.986492 | 1.433889  | 1.277147  |
| 1  | -4.492066 | 0.099606  | -3.724229 |
| 1  | -4.340304 | -1.658286 | -3.920860 |
| 1  | -5.817161 | -0.957228 | -3.232614 |
| 50 | 1.281199  | -0.161609 | -0.768467 |
| 50 | -1.212719 | -0.069601 | 0.579915  |

---

|                                              |             |
|----------------------------------------------|-------------|
| Zero-point correction=                       | 0.531471    |
| (Hartree/Particle)                           |             |
| Thermal correction to Energy=                | 0.570148    |
| Thermal correction to Enthalpy=              | 0.571092    |
| Thermal correction to Gibbs Free Energy=     | 0.458146    |
| Sum of electronic and zero-point Energies=   | -949.887526 |
| Sum of electronic and thermal Energies=      | -949.848849 |
| Sum of electronic and thermal Enthalpies=    | -949.847905 |
| Sum of electronic and thermal Free Energies= | -949.960851 |

---

## Dimer-Pb

---

| Atomic<br>Number | Coordinates (Angstroms) |           |           |
|------------------|-------------------------|-----------|-----------|
|                  | X                       | Y         | Z         |
| 14               | 4.090351                | 0.137117  | 0.558257  |
| 6                | 4.048092                | 1.764346  | -1.146539 |
| 6                | 2.897011                | 1.472357  | -0.173926 |
| 6                | 3.077513                | -1.478000 | 0.236507  |
| 6                | 3.067118                | -1.608897 | 1.767299  |
| 6                | 5.142792                | 1.013918  | -0.753563 |
| 6                | 3.892278                | -0.623999 | 2.282547  |
| 6                | 2.256741                | -2.639333 | 2.514971  |
| 1                | 2.425371                | -2.600795 | 3.597538  |
| 1                | 1.182007                | -2.488930 | 2.328417  |
| 1                | 2.500332                | -3.653529 | 2.167339  |
| 6                | 4.205986                | -0.271617 | 3.710748  |

|    |           |           |           |
|----|-----------|-----------|-----------|
| 1  | 3.894997  | 0.757246  | 3.946178  |
| 1  | 3.705712  | -0.942569 | 4.422836  |
| 1  | 5.286578  | -0.326489 | 3.906498  |
| 6  | 3.496878  | -2.728767 | -0.547591 |
| 1  | 4.453746  | -3.133064 | -0.174435 |
| 1  | 2.751912  | -3.535844 | -0.468667 |
| 1  | 3.630341  | -2.514974 | -1.617538 |
| 6  | 2.279976  | 2.690538  | 0.527772  |
| 1  | 3.060925  | 3.339010  | 0.962343  |
| 1  | 1.689964  | 3.314187  | -0.161892 |
| 1  | 1.610556  | 2.391005  | 1.345906  |
| 6  | 3.923101  | 2.704765  | -2.320994 |
| 1  | 4.854536  | 2.792769  | -2.892413 |
| 1  | 3.128731  | 2.365971  | -3.003339 |
| 1  | 3.636048  | 3.710422  | -1.981347 |
| 6  | 6.501104  | 0.879485  | -1.386239 |
| 1  | 6.711206  | -0.163418 | -1.666497 |
| 1  | 6.597954  | 1.493810  | -2.292368 |
| 1  | 7.296725  | 1.185745  | -0.691732 |
| 6  | -2.872519 | 1.520967  | -0.126552 |
| 6  | -3.133990 | -1.435704 | 0.136339  |
| 14 | -4.181151 | 0.114376  | -0.356640 |
| 6  | -3.849860 | 2.065295  | 0.924683  |
| 6  | -2.358026 | 2.528022  | -1.165260 |
| 6  | -3.370277 | -1.880250 | -1.315815 |
| 6  | -3.423598 | -2.482358 | 1.221029  |
| 6  | -4.997877 | 1.292904  | 0.884466  |
| 6  | -4.267028 | -0.995448 | -1.889902 |
| 6  | -3.530510 | 3.231868  | 1.828330  |
| 1  | -3.190015 | 3.092828  | -1.621108 |
| 1  | -1.670306 | 3.266038  | -0.723804 |
| 1  | -1.816787 | 2.029551  | -1.981416 |
| 6  | -2.692309 | -3.070826 | -1.948674 |
| 1  | -4.429481 | -2.919167 | 1.097293  |
| 1  | -2.703933 | -3.315270 | 1.195328  |
| 1  | -3.380783 | -2.048938 | 2.230470  |
| 6  | -6.234502 | 1.353022  | 1.739390  |
| 6  | -4.809957 | -0.937235 | -3.291346 |
| 1  | -4.355845 | 3.479490  | 2.506006  |
| 1  | -2.637322 | 3.017486  | 2.434885  |



|    |           |           |           |
|----|-----------|-----------|-----------|
| 1  | -3.297948 | 4.127374  | 1.234415  |
| 1  | -3.043366 | -3.258610 | -2.970126 |
| 1  | -1.602756 | -2.917757 | -1.982873 |
| 1  | -2.867133 | -3.979267 | -1.354772 |
| 1  | -6.399109 | 0.405625  | 2.273904  |
| 1  | -6.179022 | 2.153349  | 2.490547  |
| 1  | -7.132419 | 1.531598  | 1.130335  |
| 1  | -4.536469 | 0.006123  | -3.787012 |
| 1  | -4.437529 | -1.761616 | -3.915048 |
| 1  | -5.908311 | -0.988232 | -3.294460 |
| 82 | 1.383450  | -0.213735 | -0.791950 |
| 82 | -1.298654 | -0.049953 | 0.599778  |

---

|                                              |             |
|----------------------------------------------|-------------|
| Zero-point correction=                       | 0.529942    |
| (Hartree/Particle)                           |             |
| Thermal correction to Energy=                | 0.569361    |
| Thermal correction to Enthalpy=              | 0.570305    |
| Thermal correction to Gibbs Free Energy=     | 0.453412    |
| Sum of electronic and zero-point Energies=   | -950.067171 |
| Sum of electronic and thermal Energies=      | -950.027751 |
| Sum of electronic and thermal Enthalpies=    | -950.026807 |
| Sum of electronic and thermal Free Energies= | -950.143700 |

---
